1 **Abstract**

2 **Background**

3 Epidemiological studies show increased cardiovascular disease (CVD) risks amongst individuals  
4 with psychiatric disorders, but to what degree this comorbidity is mediated by genetic and non-  
5 genetic (including medications) factors remains unclear. This study examined the genetic  
6 contribution to this comorbidity, and the sex-specific causal association between higher genetic  
7 risk of three psychiatric disorders [major depression (MD), schizophrenia and bipolar disorder]  
8 and three CVDs [coronary artery disease (CAD), heart failure (HF) and atrial fibrillation].

9 **Methods**

10 Genetic correlation and polygenic overlap between psychiatric disorders and CVDs were estimated  
11 using summary statistics from genome-wide association studies. Association between polygenic  
12 scores (PGS) for psychiatric disorders and CVD outcomes was assessed in 345,340 European-  
13 ancestry individuals (UK Biobank) using logistic regression.

14 **Results**

15 Though substantial genetic overlap was identified between psychiatric disorders and CVDs, a  
16 significant genetic correlation ( $r_g$  ranged between 0.11 and 0.25,  $p < 7.8E-06$ ) was only observed  
17 between MD and all three CVDs. A 1-standard-deviation increase in  $PGS_{MD}$  was associated with  
18 a 1.11- (95% CI: 1.06 - 1.16;  $p = 4.9E-06$ ) and 1.09-fold (95% CI: 1.04 - 1.14;  $p = 0.00041$ ) higher  
19 risk of incident CAD and HF in females, but only with a 1.04-fold (95% CI: 1.02 - 1.07;  $p =$   
20 0.0019) increased risk of incident CAD in males. The  $PGS_{MD}$  was associated with CAD and HF  
21 even in the absence of any psychiatric disorder diagnosis.

1 **Conclusions**

2 Our results suggest that the increased CVD risk in individuals with schizophrenia and bipolar  
3 disorder is likely a consequence of non-genetic factors (such as lifetime hardships and  
4 medications). Notably, shared genetic risk is an important contributor to CVD comorbidity in  
5 individuals with a diagnosis or a higher risk of MD, and more so in females than in males.

6 **Keywords**

7 Psychiatric disorder, cardiovascular disease comorbidity, depression, polygenic risk score, sex-  
8 specific risks

## 1 Non-Standard Abbreviations and Acronyms

---

| Abbreviation | Definition                                            |
|--------------|-------------------------------------------------------|
| AF           | Atrial fibrillation                                   |
| AHA          | American Heart Association                            |
| AUC          | Area under the receiver operator characteristic curve |
| BD           | Bipolar disorder                                      |
| BMI          | Body mass index                                       |
| CAD          | Coronary artery disease                               |
| CI           | Confidence interval                                   |
| CPT          | Current Procedural Terminology                        |
| CVD          | Cardiovascular disease                                |
| EHR          | Electronic health record                              |
| GWAS         | Genome-wide association study                         |
| HF           | Heart failure                                         |
| ICD          | International Classification of Diseases              |
| LD           | Linkage disequilibrium                                |
| LDSC         | LD score regression                                   |
| MD           | Major depression                                      |
| MDD          | Major depressive disorder                             |
| MHC          | Major histocompatibility complex                      |
| MR           | Mendelian randomisation                               |
| OR           | Odds ratio                                            |
| PC           | Principal component                                   |
| PGS          | Polygenic score                                       |
| PRS-CS       | Polygenic Risk Score–Continuous Shrinkage             |
| SCZ          | Schizophrenia                                         |
| SD           | Standard deviation                                    |
| SNP          | Single nucleotide polymorphism                        |
| VUMC         | Vanderbilt University Medical Center                  |

---

2

## 1 Introduction

2 The idea that mental health is linked to cardiovascular health has long been recognised: William  
3 Harvey wrote in 1628 “every affection of the mind that is attended with either pain or pleasure,  
4 hope or fear, is the cause of an agitation whose influence extends to the heart” <sup>1</sup>. Modern  
5 epidemiological studies find that collectively, individuals with psychiatric disorders, namely major  
6 depressive disorder (MDD), schizophrenia (SCZ) and bipolar disorder (BD), have a ~50% higher  
7 odds of developing cardiovascular diseases (CVD) <sup>2</sup>. In particular, there is a doubling of the odds  
8 of developing coronary heart disease amongst individuals with depression, and those with SCZ are  
9 at a higher risk of coronary heart disease and congestive heart failure (HF) <sup>2</sup>. Furthermore,  
10 prospective studies have reported that depression status predicts incidence of cardiovascular heart  
11 disease, and cardiac mortality in cohorts with and without clinically diagnosed cardiovascular heart  
12 disease at enrolment <sup>3</sup>.

13 There is marked sex difference in psychiatric disorders and CVDs, in both prevalence and clinical  
14 presentation. Depression is twice as prevalent in females than males (lifetime prevalence of 26.1%  
15 versus 14.7%) <sup>4,5</sup>, with women showing augmented symptom severity <sup>6</sup>. While the prevalence of  
16 SCZ does not differ between genders, men with SCZ show earlier age of onset and worse  
17 premorbid functioning <sup>7</sup>. Men also show an earlier onset for BD, although the prevalence is  
18 reported to be equal between sexes for bipolar I disorder but higher in women for bipolar II  
19 disorder, which is characterised by depressive episodes <sup>8</sup>. Furthermore, although it is traditionally  
20 considered to be a male disease (lifetime risk of 60.3% in men versus 55.6% in women at an index  
21 age of 45 years) <sup>9</sup>, CVD is a leading cause of female deaths, and women have higher CVD-related  
22 mortality rates relative to men (hazard ratio of 1.07 for death amongst women aged  $\leq 55$  years, but  
23 no significant association amongst men aged  $\leq 55$  years) <sup>10,11</sup>. Furthermore, although CVD

1 mortality has declined in recent years, the decline has stagnated in young women, a time period  
2 that coincides with increased rates of depression <sup>10</sup>. Such evidence suggests that the comorbidity  
3 of depression and CVDs is likely to have more pronounced effects in females.

4 The increased CVD risk amongst individuals with psychiatric disorders may be attributed to a  
5 combination of non-genetic and genetic factors. Psychiatric disorders are associated with stress  
6 (both as cause and consequence) which can lead to diverse biological alterations that predispose  
7 individuals to an increased CVD risk, such as changes in immune activities, lipid profiles, heart  
8 rate, and blood pressure <sup>12-14</sup>. Behaviourally, psychiatric disorders and chronic stress may trigger  
9 adoption of unhealthy habits, such as smoking and social isolation, and further exacerbate the  
10 cardiac risk-increasing biological impacts <sup>12,13</sup>. Moreover, the use of some commonly prescribed  
11 psychiatric medications is associated with increased blood pressure, obesity, stroke, and atrial  
12 fibrillation (AF) <sup>15,16</sup>. To what extent comorbidity between different psychiatric disorders and  
13 different CVDs is attributable to shared non-genetic or genetic factors is an outstanding question,  
14 and one that will better inform CVD prevention strategies.

15 Large genome-wide association studies (GWAS) have been very successful at identifying genetic  
16 loci associated with disease risk. Novel statistical methods applied to GWAS data are facilitating  
17 our understanding of shared biology between two diseases, as well as in making causal inferences,  
18 overcoming some of the caveats of observational studies of comorbidity. Previous genetic  
19 analyses, for example, have identified a causal effect of depression on coronary artery disease  
20 (CAD) <sup>17,18</sup>. However, analyses across different psychiatric disorders and CVDs, and investigation  
21 of sex differences using such genetic approaches have not yet been done. In this study, we used  
22 GWAS summary data to investigate the degree of genetic overlap between three psychiatric  
23 disorders (BD, major depression (MD) and SCZ) and three CVDs (AF, CAD and HF). We also

1 used polygenic scores (PGS) derived from GWAS summary statistics (which estimate an  
2 individual's genetic liability to a disease) to examine the causal association in an independent  
3 sample, between higher genetic risk of psychiatric disorders and incident CVD in males and  
4 females separately.

1 **Methods**

2 Publicly available datasets analysed in this study are referenced in Methods or Supplementary  
3 Materials. For more information on data analysed and scripts please see the Major Resources Table  
4 in the Supplemental Materials.

5 **UK Biobank cohort summary**

6 The UK Biobank cohort consists of over 500,000 participants (aged 40-69 years at baseline) from  
7 the UK, who were recruited between 2006 and 2010 <sup>19</sup>. Diverse phenotypic and genomic data were  
8 collected from participants, such as clinical diagnosis, physical and biochemical measurements,  
9 and answers from questionnaires. Consents were collected from all participants. Current study was  
10 conducted using the UK Biobank Resource under Application Number 12505. This research is  
11 covered by the University of Queensland Human Research Ethics Committee approval (HREC  
12 number 2020/HE002938). After quality control (details described in Supplementary Methods), a  
13 total of 345,340 unrelated (genetic relatedness < 0.05) individuals of European ancestry were  
14 subjected to analysis in this study (ancestry calling is described in Yengo et al. <sup>20</sup>).

15 **BioVU cohort summary**

16 Vanderbilt University Medical Center (VUMC) is a tertiary care centre that provides inpatient and  
17 outpatient care in middle Tennessee, US. The VUMC electronic health record (EHR) system,  
18 established in 1990, includes data on billing codes from the International Classification of  
19 Diseases, 9<sup>th</sup> and 10<sup>th</sup> editions (ICD-9 and ICD-10), Current Procedural Terminology (CPT) codes,  
20 laboratory values, reports, and clinical documentation. In 2007, VUMC launched a biobank,  
21 BioVU, which links a patient's DNA sample to their EHR. The BioVU consent form is provided



1 to patients in the outpatient clinic environments at VUMC. The VUMC Institutional Review Board  
2 oversees BioVU and approved this project (IRB#172020). At VUMC, all medical record data were  
3 extracted from the EHRs of 72,634 individuals of European ancestry.

#### 4 **GWAS summary statistics**

5 Association summary statistics derived from European-ancestry or predominantly European-  
6 ancestry cohorts were retrieved for three CVDs (AF, CAD and HF), and three psychiatric disorders  
7 (BD, MD and SCZ). Summary statistics used for genetic correlation estimation are summarised in  
8 Supplementary Table 1. Summary statistics used for PGS single nucleotide polymorphism (SNP)  
9 weight generation for prediction in the UK Biobank and BioVU cohorts are summarised in  
10 Supplementary Table 2 and Supplementary Table 3 respectively.

#### 11 **Genetic correlation**

12 Using GWAS summary statistics derived from European-ancestry cohorts (Supplementary Table  
13 1) and linkage disequilibrium (LD) scores from the European 1000 Genomes cohort, pairwise  
14 genetic correlations between CVDs and psychiatric disorders were estimated with LD score  
15 regression (LDSC) (version 1.0.1)<sup>21</sup>. A  $p < 0.0056$  indicated statistical significance (after multiple  
16 testing correction for three CVDs and three psychiatric disorders).

#### 17 **Polygenic overlap analysis**

18 MiXeR is used to estimate polygenic overlap, reflected by fraction of shared genetic variants  
19 between two traits, irrespective of genetic correlation<sup>22</sup>. Detailed information on MiXeR, and  
20 polygenic overlap with and without genetic correlation, is presented in Supplementary Methods  
21 and Supplementary Figure 1. We performed MiXeR (version 1.2.0) analysis to estimate the degree

1 of polygenic overlap between CVDs and psychiatric disorders under default settings, using LD  
2 references derived from 1000 Genomes Phase 3 <sup>22</sup>. We excluded the major histocompatibility  
3 complex (MHC) (chromosome 6:26000000-34000000) region from analysis due to its complex  
4 LD structure.

#### 5 **UK Biobank phenotype ascertainment**

6 The inclusion and exclusion criteria for the CVDs, psychiatric disorders, and individuals with no  
7 psychiatric disorder diagnosis or psychiatric medications are shown in Supplementary Table 4,  
8 Supplementary Table 5 and Supplementary Table 6 respectively. Smoking status, defined as ever  
9 having smoked, was collated from UK Biobank data-field 20116 (“Smoking status”). The average  
10 body mass index (BMI) of individuals was calculated (data-field 21001). The recruitment ages (in  
11 years) of individuals were calculated using “Date of attending assessment centre” (data-field 53)  
12 and “Year of birth” (data-field 34). Summary of age, smoking status and BMI are presented in  
13 Supplementary Table 7 and Supplementary Table 8.

#### 14 **UK Biobank incident CVD ascertainment**

15 For each CVD, incident cases were defined as individuals who received all disease-associated  
16 ICD-10 diagnosis after their recruitment into the UK Biobank (data-field 41280), individuals who  
17 self-reported disease-related illness (data-field 20002) after their first assessment, or had a disease-  
18 associated ICD-10 code reported as primary or secondary death causes.

#### 19 **BioVU phenotype ascertainment**

20 For the BioVU cohort, the inclusion and exclusion criteria for CVDs and psychiatric disorders are  
21 shown in Supplementary Table 9. Smoking status was ascertained by “tobacco use disorder”

1 (Phecode 318), which is a strong proxy for smoking. The median BMI and median age of  
2 individuals were selected from assessments taken at chronological visits, available in the medical  
3 records at VUMC. Summary of phenotypes is presented in Supplementary Table 10.

#### 4 **Polygenic score generation**

5 PGSs are calculated to estimate the lifetime genetic liability of an individual to a trait. Briefly, we  
6 define a PGS of an individual,  $j$ , as a weighted sum of SNP allele counts:  $\sum_{i=1}^m b_i x_{ij}$ , where  $m$  is  
7 the number of SNPs included in the predictor,  $b_i$  is the per-allele weight (based on the estimated  
8 effect of the allele on trait value) for the SNP,  $x_{ij}$  is a count of the number (0, 1, or 2) of trait-  
9 associated alleles of SNP  $i$  in individual  $j$ .

10 For prediction into the UK Biobank cohort, we estimated the per-allele weights for SNPs with  
11 SBayesR using default settings unless otherwise stated (--exclude-mhc; --chain-length 50000; --  
12 burn-in 10000; --no-mcmc-bin)<sup>23</sup>. SBayesR implements a Bayesian approach, uses an LD  
13 reference (banded LD matrix retrieved from the SBayesR website) to select variants and estimate  
14 per-allele weights, does not require a training dataset for identifying trait-associated SNPs and  
15 estimating per-allele weights for PGS calculation, and is computationally efficient<sup>23,24</sup>.

16 GWAS summary statistics used for per-allele weight prediction for the UK Biobank cohort were  
17 derived from cohorts that did not include any UK Biobank data (Supplementary Table 2). For each  
18 disease, we applied PLINK1.9<sup>25</sup> to generate PGS for each unrelated individual of European  
19 ancestry, to avoid biases introduced by population stratification and cryptic relatedness.

20 PGSs in BioVU were generated using Polygenic Risk Score–Continuous Shrinkage (PRS-CS)<sup>26</sup>  
21 (which has been shown to have similar performance to SBayesR<sup>24</sup>), with GWAS summary

1 statistics derived from cohorts that did not include the BioVU cohort (Supplementary Table 3).  
2 The LD reference panel was constructed from 503 European samples in the 1000 Genomes Project  
3 Phase 3.41.

4 The PGS distribution was scaled to a mean of zero and standard deviation (SD) of 1; therefore,  
5 effect size estimates in subsequent logistic regressions were interpreted as changes in outcome per  
6 1-SD increase in PGS. To validate the accuracy of PGS, logistic regression was used to examine  
7 the association with disease prevalent cases (hereby defined as incident cases and existing cases at  
8 first assessment) in the prediction cohort (UK Biobank or BioVU). PGS performance was  
9 evaluated using the Nagelkerke pseudo  $R^2$  [R package rcompanion <sup>27</sup> (version 2.4.13)] and area  
10 under the receiver operator characteristic curve (AUC) [R package pROC <sup>28</sup> (version 1.18.0)]. The  
11 Nagelkerke pseudo  $R^2$  compares the null model (containing only the covariates as predictors) and  
12 the full model (with PGS added as a predictor), and is a relative measure of how well the full model  
13 explains the data compared to the null model. The AUC can be interpreted as a probability of a  
14 case having a higher PGS than a control.

### 15 **Logistic regression of PGS and incident CVD in the UK Biobank cohort**

16 For each pair of CVD and psychiatric disorder, logistic regression was used to estimate the  
17 association between incident CVD and psychiatric disorder PGS, adjusting for sex, genotyping  
18 array, age, BMI, smoking status and 20 genetic principal components (PC). For the association  
19 analysis in the overall cohort, a  $p < 0.0056$  indicated statistical significance (after multiple testing  
20 correction for three psychiatric disorders and three CVDs).

21 In sex-stratified analysis, logistic regression in males and females were conducted separately, and  
22 the logistic regression coefficients [ $\log(\text{OR})$ ] for the PGS were compared between sexes using a

1 Wald test (two-sided  $p < 0.05$  indicated statistical significance). Sensitivity analysis was performed  
2 with “death cases” (individuals with CVD as underlying cause of death but no record of CVD from  
3 primary care, hospital records or self-reported questionnaires) removed. Due to the large polygenic  
4 overlap between CVD and psychiatric disorders, to assess if the psychiatric PGSs were associated  
5 with CVD risks independently of the CVD PGS, we performed additional sensitivity analysis  
6 where the PGS for the relevant CVD was fitted as a covariate. A  $p < 0.0083$  indicated statistical  
7 significance (after multiple testing correction for three CVDs and two sexes).

8 Similarly, the overall and sex-stratified associations were estimated for CVD risks in UK Biobank  
9 participants who did not meet the criteria for the three psychiatric disorders, had no ICD diagnosis  
10 of multiple personality disorders or neurosis, had no self-reported history of mood disorders, and  
11 were not on any antidepressants or anti-psychotic medications (detailed phenotype information in  
12 Supplementary Table 6). Due to the reduced sample size, we investigated the associations for both  
13 incident and prevalent CVDs in this cohort. A  $p < 0.0083$  indicated statistical significance.

#### 14 **Logistic regression in BioVU**

15 Findings from UK Biobank were independently replicated in the BioVU cohort at VUMC. Logistic  
16 regression was used to estimate the overall and sex-stratified association between prevalent CVD  
17 and psychiatric disorder PGS, adjusting for sex, median age, median BMI, smoking status and 10  
18 genetic PCs. The overall and sex-stratified associations were also estimated for MD genetic risk  
19 amongst individuals that did not meet the criteria for the three psychiatric disorders, and had no  
20 ICD diagnosis of neurosis and psychosis.

#### 21 **Comparing incident CVD risks in top and bottom MD risk groups**

1 Using the UK Biobank cohort, we performed logistic regression to compare the risk of incident  
2 CVD in individuals who were in the top and bottom quartiles (25%) or deciles (10%) of PGS<sub>MD</sub>,  
3 adjusting for sex, genotyping array, age, BMI, smoking status and 20 genetic PCs. Sex-stratified  
4 models were also evaluated for the top and bottom MD risk groups. A  $p < 0.0083$  indicated  
5 statistical significance.

## 1 **Results**

### 2 **MD exhibits significant genetic correlation and polygenic overlap with CVDs**

3 Two traits are said to have polygenic overlap if they share genetic variants that confer non-zero  
4 effects on both traits. A non-zero genetic correlation reflects specific scenarios of polygenic  
5 overlap, where the shared genetic variants confer overall concordant (positive genetic correlation)  
6 or discordant (negative genetic correlation) effect directions on the two traits. Genetic correlation  
7 ranges between -1 and 1, where 1 means all genetic variants that increase the value of one trait,  
8 also increase the value of the second trait, while a genetic correlation of -1 indicates that all genetic  
9 variants that increase the value of one trait, decrease the value of the second trait. A lack of genetic  
10 correlation may be reported even in the presence of polygenic overlap if two traits share genetic  
11 variants, but the genetic variants exhibit a mixture of effect directions and thus showing minimal  
12 genetic correlation (further detail in Supplementary Methods and Supplementary Figure 1).

13 All six psychiatric disorders and CVDs were shown to be highly polygenic by MiXeR analysis,  
14 with hundreds of trait-associated variants estimated for each disease (Figure 1). After multiple  
15 testing correction, there was significant positive genetic correlation between MD and all three  
16 CVDs, with the strongest correlation observed for HF [ $r_g = 0.25$  (95% confidence interval (CI):  
17  $0.18 - 0.32$ ;  $p = 1.3E-13$ )] and CAD [ $r_g = 0.21$  (95% CI:  $0.17 - 0.25$ ;  $p = 3E-23$ )], and lower but  
18 significant correlation with AF [ $r_g = 0.11$  (95% CI:  $0.063 - 0.16$ ;  $p = 7.8E-6$ )], which agrees with  
19 previous findings<sup>17,29</sup> (Figure 1A). Corroborating the genetic correlation results, MiXeR analysis  
20 demonstrated that a large fraction of CVD variants was shared with MD (Figure 1B). Up to 91%  
21 of the genetic variants for HF were also associated with MD, and 76.8% of these shared variants  
22 conferred concordant effect directions on both traits, explaining the high genetic correlation.

1 68.8% and 60% of CAD- and AF-associated variants, respectively, were shared with MD, and up  
2 to 83% and 92% of shared variants conferred concordant effect directions. After multiple testing  
3 correction, no significant genetic correlation with CVDs was observed for SCZ and BD (Figure  
4 1A). Though some polygenic overlap was detected for SCZ and BD with all three CVDs, the  
5 shared genetic variants comprised of ~50% with concordant effect directions on both diseases and  
6 ~50% with discordant effect directions (Figure 1B), which is consistent with the lack of genetic  
7 correlation.

## 8 **PGS validation in UK Biobank cohort**

9 We generated trait-specific PGS for 345,340 unrelated, European-ancestry individuals from the  
10 UK Biobank, as a proxy for their genetically estimated risk of developing MD, SCZ or BD.  
11 Supporting the validity of PGSs as predictors of disease risk, all PGSs showed a significant odds  
12 ratio (OR) with the corresponding prevalent disease cases (Supplementary Table 11). The  $OR_{MD}$   
13 was 1.3 (95% CI: 1.27 - 1.32;  $p < 2E-16$ ) per SD increase in  $PGS_{MD}$ , and the corresponding ORs  
14 for  $PGS_{BD}$  and  $PGS_{SCZ}$  were 2.04 (95% CI: 1.92 - 2.18;  $p < 2E-16$ ) and 2.00 (95% CI: 1.86 - 2.15;  
15  $p < 2E-16$ ) respectively. Similarly, ORs for PGS of CVDs ranged between 1.19 and 1.63 ( $p < 2E-$   
16 16). We used AUC, which can be interpreted as probability that that a case has a higher PGS than  
17 a control, to measure the prediction accuracy of our PGS models. The AUC for the models  
18 containing PGSs and covariates ranged between 0.65 and 0.8, indicating agreement between the  
19 predicted disease liability and observed prevalent cases (Supplementary Table 11). Overall, the  
20 addition of PGSs improved the prediction performance of the logistic regression models, as  
21 indicated by positive Nagelkerke  $R^2$  values (Supplementary Table 11). For the psychiatric  
22 disorders PGSs generated for the BioVU cohort, ORs ranged between 1.14 and 1.55  
23 (Supplementary Table 12).



## 1 **Genetic risk of MD is correlated with increased incident CVD**

2 We estimated the association between genetic liability to psychiatric disorders and incident CVD  
3 (Figure 2 and Supplementary Table 13). Using a multiple testing-corrected significance threshold  
4 ( $p < 0.0056$ ), PGS<sub>MD</sub> was significantly associated with all three CVDs [OR<sub>AF</sub> = 1.03 (95% CI: 1.01  
5 - 1.05;  $p = 0.0034$ ); OR<sub>CAD</sub> = 1.06 (95% CI: 1.04 - 1.09;  $p = 3.7E-07$ ); OR<sub>HF</sub> = 1.04 (95% CI: 1.01  
6 - 1.07;  $p = 0.0034$ )]. No significant association with CVD risks was observed for SCZ and BD.  
7 Similar to the UK Biobank cohort, we observed a positive association between PGS<sub>MD</sub> and  
8 prevalent CAD in the BioVU cohort, supported by nominal significance (Supplementary Figure  
9 2). However, we also observed a nominally significant, negative association between PGS<sub>BD</sub> and  
10 prevalent CAD in the BioVU cohort. Similar trends were observed in the UK Biobank cohort with  
11 prevalent cases (Supplementary Figure 2), and was thus likely due to survival bias, as this  
12 association attenuated completely with incident cases in UK Biobank (Figure 2).

13 We thus focussed our analysis on PGS<sub>MD</sub> and performed sex-stratified logistic regression with  
14 incident CVD cases (Figure 3A and Supplementary Table 14). After multiple testing correction,  
15 we found that PGS<sub>MD</sub> was significantly associated with increased CAD risk in both sexes [OR<sub>CAD-  
16 female</sub> = 1.11 (95% CI: 1.06 - 1.16;  $p = 4.9E-06$ ) and OR<sub>CAD-male</sub> = 1.04 (95% CI: 1.02 - 1.07;  $p =$   
17 0.0019)], with risk significantly higher in females compared to males (Wald test  $p < 0.05$ ). PGS<sub>MD</sub>  
18 was significantly associated with HF risk in females only [OR<sub>HF-female</sub> = 1.09 (95% CI: 1.04 - 1.14;  
19  $p = 0.00041$ )] (female versus male Wald test  $p < 0.05$ ). We did not observe statistically significant  
20 association between PGS<sub>MD</sub> and risk of AF in the sex-stratified analysis. Similar results were  
21 observed in sensitivity analyses, where “death cases” were removed, or where relevant CVD PGS  
22 was added to the model as a covariate, indicating that the significant association between  
23 psychiatric disorder PGS and incident CVDs was independent of the CVD genetic risk

1 (Supplementary Figure 3). We observed similar trends between PGS<sub>MD</sub> and CAD risk in the overall  
2 and female-specific BioVU cohort, supported by nominal significance, but we did not find a  
3 positive association with HF risk in the BioVU cohort, possibly due to the reduced sample sizes  
4 (Figure 3B and Supplementary Table 15).

### 5 **Individuals in top and bottom MD genetic risk groups differ in CVD risks**

6 Using a logistic regression model, we compared the risk for developing CVDs between individuals  
7 who were in the top and bottom quartile (25%) of PGS<sub>MD</sub>, which represented the groups with the  
8 highest and lowest genetic risk of developing MD respectively (Figure 4 and Supplementary Table  
9 16). Compared to individuals in the bottom PGS<sub>MD</sub> quartile, sex-stratified analysis reported a 32%  
10 higher CAD risk in females [ $OR_{CAD-female} = 1.32$  (95% CI: 1.16 - 1.49;  $p = 1.6E-05$ )], which was  
11 significantly higher (Wald test  $p < 0.05$ ) than the 12% increased risk in males [ $OR_{CAD-male} = 1.12$   
12 (95% CI: 1.03 - 1.21;  $p = 0.0049$ )]. Similarly, compared to the bottom quartile, females in the top  
13 25% PGS<sub>MD</sub> risk group also had a significantly higher risk of developing HF [ $OR_{HF-female} = 1.22$   
14 (95% CI: 1.07 - 1.39;  $p = 0.0034$ )], but not AF. On the contrary, the risk of incident HF amongst  
15 males in the high MD risk group did not differ from the low-risk group, while the risk of incident  
16 AF was higher in the high MD risk group, supported by nominal significance [ $OR_{AF-male} = 1.08$   
17 (95% CI: 1.01 - 1.15;  $p = 0.032$ )]. Similar results were observed for individuals with extremely  
18 high genetic risks of MD (the top 10% of PGS<sub>MD</sub>) (Supplementary Table 16).

### 19 **Genetic risk of MD is associated with increased CVD risk in individuals with no psychiatric** 20 **diagnosis and medications**

21 We also investigated the association between PGS<sub>MD</sub> and CVD statuses (both prevalent and  
22 incident) in individuals who had no psychiatric disorder diagnosis and were not on any psychiatric

1 medication. We observed a positive association between PGS<sub>MD</sub> and prevalent CAD in both sexes  
2 [OR<sub>CAD-female</sub> = 1.06 (95% CI: 1.03 - 1.1; p = 0.00099) and OR<sub>CAD-male</sub> = 1.04 (95% CI: 1.02 - 1.06;  
3 p = 1.8E-05)] (Figure 5 and Supplementary Table 17). Similar results were observed in the  
4 sensitivity analysis where the PGS<sub>CAD</sub> was added as a covariate, indicating that the observed  
5 associations were independent of the genetic overlap between MD and CAD (Supplementary  
6 Figure 4). We did not find a significant association between PGS<sub>MD</sub> and prevalent AF in the sex-  
7 stratified cohorts, except for a nominally significant positive association in the male cohort [OR<sub>AF-</sub>  
8 <sub>male</sub> = 1.03 (95% CI: 1.01 - 1.05; p = 0.011)] (Figure 5 and Supplementary Table 17). No significant  
9 associations were observed of PGS<sub>MD</sub> with HF risk, except for a nominally significant positive  
10 association in the female cohort [OR<sub>HF-female</sub> = 1.06 (95% CI: 1.01 - 1.12; p = 0.021)]. To avoid  
11 survival bias, we repeated the association analysis for incident CVD cases amongst individuals  
12 without psychiatric diagnoses and medications. Similar trends to the analysis of prevalent CVDs  
13 were observed between PGS<sub>MD</sub> and incident CVDs in this group, but no sex-stratified association  
14 reached statistical significance, possibly due to reduced sample sizes (as indicated by similar effect  
15 estimates but larger standard errors) (Figure 5 and Supplementary Table 17). Amongst BioVU  
16 participants with no psychiatric disorder diagnosis, we did not observe any significant association  
17 of PGS<sub>MD</sub> with prevalent CAD or HF, although we observed a negative association with prevalent  
18 AF for both sexes (Supplementary Figure 5). However, analysis of the BioVU cohort relied only  
19 on prevalent data, which could potentially have led to survival bias that confounded the  
20 interpretation of results.

## 1 **Discussion**

2 In this study, we find a significant genetic correlation between all three CVDs with MD, but not  
3 with SCZ or BD, suggesting that cardiovascular comorbidity within the latter is most likely a result  
4 of non-genetic factors (such as lack of physical activity, adverse dietary habits, substance use and  
5 psychiatric medications). However, even in the absence of genetic correlation, we find substantial  
6 overlap in the genetic variants associated with each psychiatric disorder and CVDs. Knowledge of  
7 these shared variants may be important for informing treatment in comorbid individuals, especially  
8 when pharmacological targeting of a shared risk locus has opposing effects on comorbid traits. For  
9 example, genetic variants in the *ACE* gene have shown to have opposing effects on CVD risk and  
10 SCZ risk <sup>30</sup>; therefore, inhibition of ACE for lowering blood pressure could potentially have  
11 adverse effects on individuals with SCZ <sup>31</sup>.

12 After accounting for age and conventional risk factors, including BMI and smoking, we showed  
13 that individuals with a higher genetic risk for MD had significantly higher risk for AF, CAD and  
14 HF. This association was independent of genetic risk of CVD, and the association with CAD and  
15 HF was of higher magnitude in females relative to males, particularly for HF, where we saw  
16 increased risk in females but no significant association in males. Interestingly, our findings showed  
17 that this association was observed even in the absence of a diagnosis of any psychiatric disorder  
18 and psychiatric medication. This warrants further studies that evaluate the importance of an  
19 individual's risk of depression in addition to any diagnosis in cardiovascular risk assessment.

20 Epidemiological studies have reported notable sex differences in the prevalence and clinical  
21 manifestation of psychiatric disorders and CVDs, with women particularly prone to depression  
22 and CVD-related mortality. Similarly, previous evidence has found depression to be a risk factor

1 for HF amongst women but not in men <sup>32</sup>. However, observational studies do not provide evidence  
2 for a causal association. Previous genetic analyses that utilise GWAS summary data to assess  
3 causality have shown that an increased genetic risk for MD is associated with an increased CAD  
4 and HF risk <sup>18</sup>. However, these studies have not investigated sex-specific associations, except for  
5 a previously reported genetic association between MD PGS and CAD observed in females but not  
6 males in a (smaller) BioVU cohort <sup>33</sup>. Corroborating previous findings, we found that the genetic  
7 predisposition to MD was associated with a greater increase in CAD and HF risk amongst females.  
8 It has been suggested that MD and CVDs may represent manifestation of a common  
9 pathophysiological dysfunction <sup>34</sup>. The pathophysiology underlying the female preponderance  
10 remains unclear, and possible mechanisms include hormonal dysregulation and pro-inflammatory  
11 response. Specific subtypes of depression, such as postpartum depression and postmenopausal  
12 depression, suggests the involvement of hormone fluctuations in depression amongst females <sup>35</sup>.  
13 Interestingly, Takotsubo cardiomyopathy, often triggered by emotional or physical stress, is the  
14 most common in postmenopausal women (90% of cases) <sup>36</sup>. At the same time, elevated  
15 inflammatory biomarkers, such as interleukin-6 and tumour necrosis factor alpha, are reportedly  
16 higher in depressed women relative to depressed men, suggesting a sex-differential inflammatory  
17 response to MD <sup>35</sup>. These pro-inflammatory cytokines are linked to incident CVD and poorer  
18 cardiovascular outcomes <sup>37,38</sup>. Further studies are required to understand the heightened risk of  
19 CVDs amongst females with depression.

20 CVD risk calculators failing to incorporate psychiatric disorders as a predictor are estimated to  
21 underestimate CVD risk by 30% and 60% in men and women respectively <sup>39</sup>. Currently, mental  
22 illnesses are included in the QRISK3 prediction algorithm (UK), and are recognised as a risk factor  
23 in New Zealand, where individuals with severe mental illness are advised to undergo earlier and

1 more frequent risk assessments <sup>40,41</sup>. Furthermore, the American Heart Association (AHA) has  
2 recommended incorporation of depression as a risk factor of adverse prognosis amongst patients  
3 with acute coronary syndrome <sup>42</sup>; however, our findings highlight the importance of investigating  
4 the predictive value of depression diagnosis and depression risk (such as family history or  
5 polygenic risk) in the preventative assessment of CVD risk, particularly amongst females.

6 Our study has several strengths. Our PGSs were derived from GWAS summary statistics with the  
7 largest sample sizes where possible, enhancing the statistical power in detecting genetic variants  
8 with small but significant effects. Previous Mendelian randomisation (MR) studies have used  
9 GWAS summary statistics derived from cohorts with overlapping samples <sup>18,29,43</sup>, which could  
10 lead to biased estimates of genetic association. To avoid any bias, our psychiatric PGSs were  
11 derived from discovery cohorts with no sample overlap with the prediction cohort (UK Biobank  
12 or BioVU). Furthermore, most of these genetic studies have used summary data from GWAS  
13 conducted in a combined sample of both males and females, and therefore were unable to  
14 investigate sex-specific association across different diseases. These studies are also unable to  
15 dissociate effects of behavioural or medication use as a consequence of depression diagnosis,  
16 which our study was able to show through analysis of individuals with no diagnosis of psychiatric  
17 disorders and psychiatric medications.

18 However, limitations of our study need to be acknowledged. We derived PGSs from sex-combined  
19 summary statistics of GWAS, which might fail to capture genetic variants that confer sex-  
20 differential associations. The between-sex genetic correlations for BD, MD and SCZ are reported  
21 to range between 0.86 and 1, indicating moderate to subtle sex differences in the genetic  
22 architecture of these psychiatric disorders <sup>44</sup>. Nevertheless, PGSs derived from sex-stratified  
23 GWAS studies, which become increasingly available for neuropsychiatric and cardiovascular traits

1 <sup>44,45</sup>, will provide additional information on the sex-differential genetic factors in diseases.  
2 Moreover, due to the lower number of CVD cases amongst females in UK Biobank, our analysis  
3 in the female cohort had lower power. Lastly, findings from the BioVU cohort may be confounded  
4 by medication status of participants, and potential survival bias as incident data are not available.

5 In conclusion, we analysed 345,340 unrelated, European-ancestry individuals from the UK  
6 Biobank cohort, and showed that a higher genetic risk of MD increases the risk of CVDs, with  
7 higher risks observed for females. To our best knowledge, this is the first study that explored the  
8 association between genetic risk of three different psychiatric disorders and risks of CAD, HF and  
9 AF, with a particular focus on sex-specific differences. Given that these CVDs have both shared  
10 and unique underlying disease biology, and that their polygenic overlap with MD varies, with the  
11 highest overlap observed for HF, future research into understanding whether an increased risk of  
12 depression increases risk of CAD, AF and HF through the same or unique biological pathways  
13 may be important for informing prevention strategies. Our study highlights the necessity of  
14 investigating the predictive value of depression diagnosis and risk, in addition to conventional  
15 cardiovascular risk factors, in preventative CVD risk assessments, particularly for females. In  
16 addition, individuals with depression diagnosis or family histories constitute a high-risk cohort for  
17 CVD and merit close monitoring on their risk of CVDs.

18

1 **Novelty and Significance**

2 **What is known?**

- 3 • Epidemiological evidence reports that individuals with psychiatric disorders are at a  
4 highest risk of developing CVDs, but to what degree this cardiovascular comorbidity is  
5 attributable to environmental or genetic factors remains unclear
- 6 • There is marked sex differences in the prevalence and clinical presentation of psychiatric  
7 disorders, with women reported to show a highest risk of adverse cardiovascular outcomes  
8 after a diagnosis of depression.

9 **What new information does this article contribute?**

- 10 • Though we identify substantial overlap in the genetic loci associated with both psychiatric  
11 disorders and CVDs, significant genetic correlation between CVDs and depression  
12 suggests shared pathophysiology, while the lack of genetic correlation with schizophrenia  
13 and bipolar disorder suggests that non-genetic factors (e.g. lifetime hardships that may lead  
14 to an adverse lifestyle, as well as psychiatric medication) may play a larger role in CVD  
15 comorbidity for these disorders.
- 16 • A higher risk of CVD outcomes was present in individuals with a high genetic risk of  
17 depression even in the absence of a depression diagnosis, and this risk was higher in  
18 females.
- 19 • Notably, a higher genetic risk of depression was associated with an increased risk of CAD  
20 and HF in females, and increased risk of CAD but not HF in males.



1 Our study uses polygenic scores, an estimate of the genetic risk of psychiatric disorders, to  
2 investigate the causal association between psychiatric disorders and risk of CVDs, with a particular  
3 focus on sex differences. Identification of the shared genetic loci between CVDs and psychiatric  
4 disorders will be important for informing treatment, especially where a pharmacological agent  
5 targeting a shared factor may have opposing effects on the comorbid diseases. QRISK3 is the only  
6 tool that incorporates diagnosis of severe mental illnesses (including major depression) in primary  
7 prevention of CVD; however, our study shows that even in the absence of any psychiatric disorder  
8 diagnosis, a high genetic risk of depression may be an important consideration, especially in  
9 women. Our study highlights the need for further evaluating both depression risk and diagnosis  
10 for primary prevention of CVD.

## 1 **Acknowledgments**

2 We would like to thank the research participants and employees of 23andMe, inc. for making this  
3 work possible. The full GWAS summary statistics for the 23andMe discovery dataset will be made  
4 available through 23andMe to qualified researchers under an agreement with 23andMe that  
5 protects the privacy of the 23andMe participants. Please visit  
6 <https://research.23andme.com/collaborate/#dataset-access/> for more information and to apply to  
7 access the data.

8 The dataset(s) used for the BioVU analyses described were obtained from Vanderbilt University  
9 Medical Center's BioVU which is supported by numerous sources: institutional funding, private  
10 agencies, and federal grants. These include the NIH funded Shared Instrumentation Grant  
11 S10RR025141; and CTSA grants UL1TR002243, UL1TR000445, and UL1RR024975. Genomic  
12 data are also supported by investigator-led projects that include U01HG004798, R01NS032830,  
13 RC2GM092618, P50GM115305, U01HG006378, U19HL065962, R01HD074711; and additional  
14 funding sources listed at <https://victr.vumc.org/biovu-funding/>.

15 This publication (journal article, etc.) was supported by Grant No. R01 HG011405, partially  
16 funded by the Office of Research on Women's Health, Office of the Director, NIH and the National  
17 Human Genome Research Institute. Its contents are solely the responsibility of the authors and do  
18 not necessarily represent the official views of the Office of Research on Women's Health or the  
19 National Human Genome Research Institute.

20 The scripts used in the study are available on:  
21 [https://github.com/CNSGenomics/CVD\\_psych\\_PRS\\_Jiang](https://github.com/CNSGenomics/CVD_psych_PRS_Jiang).

1 **Sources of Funding**

2 JCJ is supported by a National Health and Medical Research Council (NHMRC) IDEAS grant  
3 (2000637). KS is supported by the American Heart Association Predoctoral Fellowship  
4 (AHA827137). LKD is supported by funding from the National Institute of Mental Health (NIMH)  
5 (R56MH120736); and the National Human Genome Research Institute (NHGRI) and the Office  
6 of Research on Women’s Health (R01HG011405). NRW is supported by NHMRC Program Grant  
7 (1113400); and NHMRC Investigator Grant (1173790). SS is supported by funding from the  
8 NHMRC Program Grant (1113400); NHMRC Early Career Fellowship (APP1142495); and  
9 National Heart Foundation Future Leader Fellowship (105638).

10 **Disclosures**

11 None.

12

- 1 **Supplementary Material**
- 2 Supplementary Methods
- 3 Supplementary Figure 1
- 4 Supplementary Figure 2
- 5 Supplementary Figure 3
- 6 Supplementary Figure 4
- 7 Supplementary Figure 5
- 8 Supplementary Table 1
- 9 Supplementary Table 2
- 10 Supplementary Table 3
- 11 Supplementary Table 4
- 12 Supplementary Table 5
- 13 Supplementary Table 6
- 14 Supplementary Table 7
- 15 Supplementary Table 8
- 16 Supplementary Table 9
- 17 Supplementary Table 10

- 1 Supplementary Table 11
- 2 Supplementary Table 12
- 3 Supplementary Table 13
- 4 Supplementary Table 14
- 5 Supplementary Table 15
- 6 Supplementary Table 16
- 7 Supplementary Table 17
- 8 Major Resources Table
- 9

## 1   **References**

- 2   1.     Graboyes TB. Stress and the aching heart. *N Engl J Med*. 1984;311:594-595.
- 3   2.     Correll CU, Solmi M, Veronese N, Bortolato B, Rosson S, Santonastaso P, Thapa-Chhetri  
4     N, Fornaro M, Gallicchio D, Collantoni E, et al. Prevalence, incidence and mortality from  
5     cardiovascular disease in patients with pooled and specific severe mental illness: a large-  
6     scale meta-analysis of 3,211,768 patients and 113,383,368 controls. *World Psychiatry*.  
7     2017;16:163-180.
- 8   3.     Carney RM, Freedland KE. Depression, mortality, and medical morbidity in patients with  
9     coronary heart disease. *Biol Psychiatry*. 2003;54:241-247.
- 10  4.     Bromet E, Andrade LH, Hwang I, Sampson NA, Alonso J, de Girolamo G, de Graaf R,  
11     Demyttenaere K, Hu C, Iwata N, et al. Cross-national epidemiology of DSM-IV major  
12     depressive episode. *BMC Med*. 2011;9:90.
- 13  5.     Hasin DS, Sarvet AL, Meyers JL, Saha TD, Ruan WJ, Stohl M, Grant BF. Epidemiology  
14     of adult DSM-5 major depressive disorder and its specifiers in the United States. *JAMA*  
15     *Psychiatry*. 2018;75:336-346.
- 16  6.     Marcus SM, Kerber KB, Rush AJ, Wisniewski SR, Nierenberg A, Balasubramani GK, Ritz  
17     L, Kornstein S, Young EA, Trivedi MH. Sex differences in depression symptoms in  
18     treatment-seeking adults: confirmatory analyses from the Sequenced Treatment  
19     Alternatives to Relieve Depression study. *Compr Psychiatry*. 2008;49:238-246.
- 20  7.     Ochoa S, Usall J, Cobo J, Labad X, Kulkarni J. Gender differences in schizophrenia and  
21     first-episode psychosis: a comprehensive literature review. *Schizophr Res Treatment*.  
22     2012;2012:916198.

- 1 8. Vega P, Barbeito S, de Azúa SR, Martínez-Cengotitabengoa M, González-Ortega I, Saenz  
2 M, González-Pinto A. Bipolar disorder differences between genders: special  
3 considerations for women. *Womens Health*. 2011;7:663-676.
- 4 9. Wilkins JT, Ning H, Berry J, Zhao L, Dyer AR, Lloyd-Jones DM. Lifetime risk and years  
5 lived free of total cardiovascular disease. *JAMA*. 2012;308:1795-1801.
- 6 10. Garcia M, Mulvagh SL, Merz CNB, Buring JE, Manson JE. Cardiovascular disease in  
7 women. *Circ Res*. 2016;118:1273-1293.
- 8 11. Shah AJ, Ghasemzadeh N, Zaragoza-Macias E, Patel R, Eapen DJ, Neeland IJ, Pimple PM,  
9 Zafari AM, Quyyumi AA, Vaccarino V. Sex and age differences in the association of  
10 depression with obstructive coronary artery disease and adverse cardiovascular events. *J*  
11 *Am Heart Assoc*. 2014;3:e000741.
- 12 12. Abed MA, Kloub MI, Moser DK. Anxiety and adverse health outcomes among cardiac  
13 patients: a biobehavioral model. *J Cardiovasc Nurs*. 2014;29.
- 14 13. Larsen BA, Christenfeld NJS. Cardiovascular disease and psychiatric comorbidity: the  
15 potential role of perseverative cognition. *Cardiovasc Psychiatry Neurol*.  
16 2009;2009:791017-791017.
- 17 14. Hildrum B, Romild U, Holmen J. Anxiety and depression lowers blood pressure: 22-year  
18 follow-up of the population based HUNT study, Norway. *BMC Public Health*.  
19 2011;11:601.
- 20 15. Licht CMM, de Geus EJC, Seldenrijk A, van Hout HPJ, Zitman FG, van Dyck R, Penninx  
21 BWJH. Depression is associated with decreased blood pressure, but antidepressant use  
22 increases the risk for hypertension. *Hypertension*. 2009;53:631-638.

- 1 16. Juang H-T, Chen P-C, Chien K-L. Using antidepressants and the risk of stroke recurrence:  
2 report from a national representative cohort study. *BMC Neurol.* 2015;15:86.
- 3 17. Hagenaars SP, Coleman JRI, Choi SW, Gaspar H, Adams MJ, Howard DM, Hodgson K,  
4 Traylor M, Air TM, Andlauer TFM, et al. Genetic comorbidity between major depression  
5 and cardio-metabolic traits, stratified by age at onset of major depression. *Am J Med Genet*  
6 *B Neuropsychiatr Genet.* 2020;183:309-330.
- 7 18. Lu Y, Wang Z, Georgakis MK, Lin H, Zheng L. Genetic liability to depression and risk of  
8 coronary artery disease, myocardial infarction, and other cardiovascular outcomes. *J Am*  
9 *Heart Assoc.* 2021;10:e017986.
- 10 19. Bycroft C, Freeman C, Petkova D, Band G, Elliott LT, Sharp K, Motyer A, Vukcevic D,  
11 Delaneau O, O'Connell J, et al. The UK Biobank resource with deep phenotyping and  
12 genomic data. *Nature.* 2018;562:203-209.
- 13 20. Yengo L, Sidorenko J, Kemper KE, Zheng Z, Wood AR, Weedon MN, Frayling TM,  
14 Hirschhorn J, Yang J, Visscher PM, et al. Meta-analysis of genome-wide association  
15 studies for height and body mass index in ~700000 individuals of European ancestry. *Hum*  
16 *Mol Genet.* 2018;27:3641-3649.
- 17 21. Bulik-Sullivan B, Finucane HK, Anttila V, Gusev A, Day FR, Loh P-R, Duncan L, Perry  
18 JRB, Patterson N, Robinson EB, et al. An atlas of genetic correlations across human  
19 diseases and traits. *Nat Genet.* 2015;47:1236-1241.
- 20 22. Frei O, Holland D, Smeland OB, Shadrin AA, Fan CC, Maeland S, O'Connell KS, Wang  
21 Y, Djurovic S, Thompson WK, et al. Bivariate causal mixture model quantifies polygenic  
22 overlap between complex traits beyond genetic correlation. *Nat Commun.* 2019;10:2417.



- 1 23. Lloyd-Jones LR, Zeng J, Sidorenko J, Yengo L, Moser G, Kemper KE, Wang H, Zheng Z,  
2 Magi R, Esko T, et al. Improved polygenic prediction by Bayesian multiple regression on  
3 summary statistics. *Nat Commun.* 2019;10:5086.
- 4 24. Ni G, Zeng J, Revez JA, Wang Y, Zheng Z, Ge T, Restuadi R, Kiewa J, Nyholt DR,  
5 Coleman JRI, et al. A comparison of ten polygenic score methods for psychiatric disorders  
6 applied across multiple cohorts. *Biol Psychiatry.* 2021;90:611-620.
- 7 25. Chang CC, Chow CC, Tellier LCAM, Vattikuti S, Purcell SM, Lee JJ. Second-generation  
8 PLINK: rising to the challenge of larger and richer datasets. *GigaScience.* 2015;4:s13742-  
9 13015-10047-13748.
- 10 26. Ge T, Chen C-Y, Ni Y, Feng Y-CA, Smoller JW. Polygenic prediction via Bayesian  
11 regression and continuous shrinkage priors. *Nat Commun.* 2019;10:1776.
- 12 27. Mangiafico S. rcompanion: Functions to support extension education program evaluation.  
13 In; 2022.
- 14 28. Robin X, Turck N, Hainard A, Tiberti N, Lisacek F, Sanchez J-C, Müller M. pROC: an  
15 open-source package for R and S+ to analyze and compare ROC curves. *BMC*  
16 *Bioinformatics.* 2011;12:77.
- 17 29. Zhang F, Cao H, Baranova A. Shared genetic liability and causal associations between  
18 major depressive disorder and cardiovascular diseases. *Front Cardiovasc Med.* 2021;8.
- 19 30. Trubetskoy V, Pardiñas AF, Qi T, Panagiotaropoulou G, Awasthi S, Bigdeli TB, Bryois J,  
20 Chen C-Y, Dennison CA, Hall LS, et al. Mapping genomic loci implicates genes and  
21 synaptic biology in schizophrenia. *Nature.* 2022;604:502-508.

- 1 31. Chauquet S, Zhu Z, O'Donovan MC, Walters JTR, Wray NR, Shah S. Association of  
2 antihypertensive drug target genes with psychiatric disorders: a Mendelian randomization  
3 study. *JAMA Psychiatry*. 2021;78:623-631.
- 4 32. Williams SA, Kasl SV, Heiat A, Abramson JL, Krumholz HM, Vaccarino V. Depression  
5 and risk of heart failure among the elderly: a prospective community-based study.  
6 *Psychosom Med*. 2002;64:6-12.
- 7 33. Dennis J, Sealock J, Levinson RT, Farber-Eger E, Franco J, Fong S, Straub P, Hucks D,  
8 Song WL, Linton MF, et al. Genetic risk for major depressive disorder and loneliness in  
9 sex-specific associations with coronary artery disease. *Mol Psychiatry*. 2021;26:4254-  
10 4264.
- 11 34. Khandaker GM, Zuber V, Rees JMB, Carvalho L, Mason AM, Foley CN, Gkatzionis A,  
12 Jones PB, Burgess S. Shared mechanisms between coronary heart disease and depression:  
13 findings from a large UK general population-based cohort. *Mol Psychiatry*. 2020;25:1477-  
14 1486.
- 15 35. Tobaldini E, Carandina A, Toschi-Dias E, Erba L, Furlan L, Sgoifo A, Montano N.  
16 Depression and cardiovascular autonomic control: a matter of vagus and sex paradox.  
17 *Neurosci Biobehav Rev*. 2020;116:154-161.
- 18 36. Schneider B, Sechtem U. Influence of age and gender in Takotsubo Syndrome. *Heart Fail*  
19 *Clin*. 2016;12:521-530.
- 20 37. Ridker PM, Rane M. Interleukin-6 signaling and anti-Interleukin-6 therapeutics in  
21 cardiovascular disease. *Circ Res*. 2021;128:1728-1746.
- 22 38. Kaptoge S, Seshasai SRK, Gao P, Freitag DF, Butterworth AS, Borglykke A, Di  
23 Angelantonio E, Gudnason V, Rumley A, Lowe GDO, et al. Inflammatory cytokines and

- 1 risk of coronary heart disease: new prospective study and updated meta-analysis. *Eur Heart*  
2 *J.* 2013;35:578-589.
- 3 39. Cunningham R, Poppe K, Peterson D, Every-Palmer S, Soosay I, Jackson R. Prediction of  
4 cardiovascular disease risk among people with severe mental illness: A cohort study. *PLoS*  
5 *One.* 2019;14:e0221521-e0221521.
- 6 40. Hippisley-Cox J, Coupland C, Brindle P. Development and validation of QRISK3 risk  
7 prediction algorithms to estimate future risk of cardiovascular disease: prospective cohort  
8 study. *BMJ.* 2017;357:j2099.
- 9 41. Ministry of Health New Zealand. Cardiovascular disease risk assessment and management  
10 for primary care. 2018.
- 11 42. Lichtman JH, Froelicher ES, Blumenthal JA, Carney RM, Doering LV, Frasure-Smith N,  
12 Freedland KE, Jaffe AS, Leifheit-Limson EC, Sheps DS, et al. Depression as a risk factor  
13 for poor prognosis among patients with acute coronary syndrome: systematic review and  
14 recommendations. *Circulation.* 2014;129:1350-1369.
- 15 43. Tang B, Yuan S, Xiong Y, He Q, Larsson SC. Major depressive disorder and  
16 cardiometabolic diseases: a bidirectional Mendelian randomisation study. *Diabetologia.*  
17 2020;63:1305-1311.
- 18 44. Martin J, Khramtsova EA, Goleva SB, Blokland GAM, Traglia M, Walters RK, Hübel C,  
19 Coleman JRI, Breen G, Børglum AD, et al. Examining sex-differentiated genetic effects  
20 across neuropsychiatric and behavioral traits. *Biol Psychiatry.* 2021;89:1127-1137.
- 21 45. Deloukas P, Kanoni S, Willenborg C, Farrall M, Assimes TL, Thompson JR, Ingelsson E,  
22 Saleheen D, Erdmann J, Goldstein BA, et al. Large-scale association analysis identifies  
23 new risk loci for coronary artery disease. *Nat Genet.* 2013;45:25-33.

- 1 46. Nielsen JB, Thorolfsson RB, Fritsche LG, Zhou W, Skov MW, Graham SE, Herron TJ,  
2 McCarthy S, Schmidt EM, Sveinbjornsson G, et al. Biobank-driven genomic discovery  
3 yields new insight into atrial fibrillation biology. *Nat Genet.* 2018;50:1234-1239.
- 4 47. Mullins N, Forstner AJ, O'Connell KS, Coombes B, Coleman JRI, Qiao Z, Als TD, Bigdeli  
5 TB, Børte S, Bryois J, et al. Genome-wide association study of more than 40,000 bipolar  
6 disorder cases provides new insights into the underlying biology. *Nat Genet.* 2021;53:817-  
7 829.
- 8 48. van der Harst P, Verweij N. Identification of 64 novel genetic loci provides an expanded  
9 view on the genetic architecture of coronary artery disease. *Circ Res.* 2018;122:433-443.
- 10 49. Shah S, Henry A, Roselli C, Lin H, Sveinbjörnsson G, Fatemifar G, Hedman ÅK, Wilk JB,  
11 Morley MP, Chaffin MD, et al. Genome-wide association and Mendelian randomisation  
12 analysis provide insights into the pathogenesis of heart failure. *Nat Commun.* 2020;11:163.
- 13 50. Howard DM, Adams MJ, Clarke TK, Hafferty JD, Gibson J, Shirali M, Coleman JRI,  
14 Hagens SP, Ward J, Wigmore EM, et al. Genome-wide meta-analysis of depression  
15 identifies 102 independent variants and highlights the importance of the prefrontal brain  
16 regions. *Nat Neurosci.* 2019;22:343-352.
- 17 51. Lam M, Chen C-Y, Li Z, Martin AR, Bryois J, Ma X, Gaspar H, Ikeda M, Benjamin B,  
18 Brown BC, et al. Comparative genetic architectures of schizophrenia in East Asian and  
19 European populations. *Nat Genet.* 2019;51:1670-1678.
- 20 52. Christophersen IE, Rienstra M, Roselli C, Yin X, Geelhoed B, Barnard J, Lin H, Arking  
21 DE, Smith AV, Albert CM, et al. Large-scale analyses of common and rare variants  
22 identify 12 new loci associated with atrial fibrillation. *Nat Genet.* 2017;49:946-952.

- 1 53. Stahl EA, Breen G, Forstner AJ, McQuillin A, Ripke S, Trubetskoy V, Mattheisen M,  
2 Wang Y, Coleman JRI, Gaspar HA, et al. Genome-wide association study identifies 30 loci  
3 associated with bipolar disorder. *Nat Genet.* 2019;51:793-803.
- 4 54. Nikpay M, Goel A, Won H-H, Hall LM, Willenborg C, Kanoni S, Saleheen D, Kyriakou  
5 T, Nelson CP, Hopewell JC, et al. A comprehensive 1000 Genomes–based genome-wide  
6 association meta-analysis of coronary artery disease. *Nat Genet.* 2015;47:1121-1130.
- 7 55. Wray NR, Ripke S, Mattheisen M, Trzaskowski M, Byrne EM, Abdellaoui A, Adams MJ,  
8 Agerbo E, Air TM, Andlauer TMF, et al. Genome-wide association analyses identify 44  
9 risk variants and refine the genetic architecture of major depression. *Nat Genet.*  
10 2018;50:668-681.
- 11 56. Pardiñas AF, Holmans P, Pocklington AJ, Escott-Price V, Ripke S, Carrera N, Legge SE,  
12 Bishop S, Cameron D, Hamshere ML, et al. Common schizophrenia alleles are enriched in  
13 mutation-intolerant genes and in regions under strong background selection. *Nat Genet.*  
14 2018;50:381-389.

15

# 1 Figure Legends

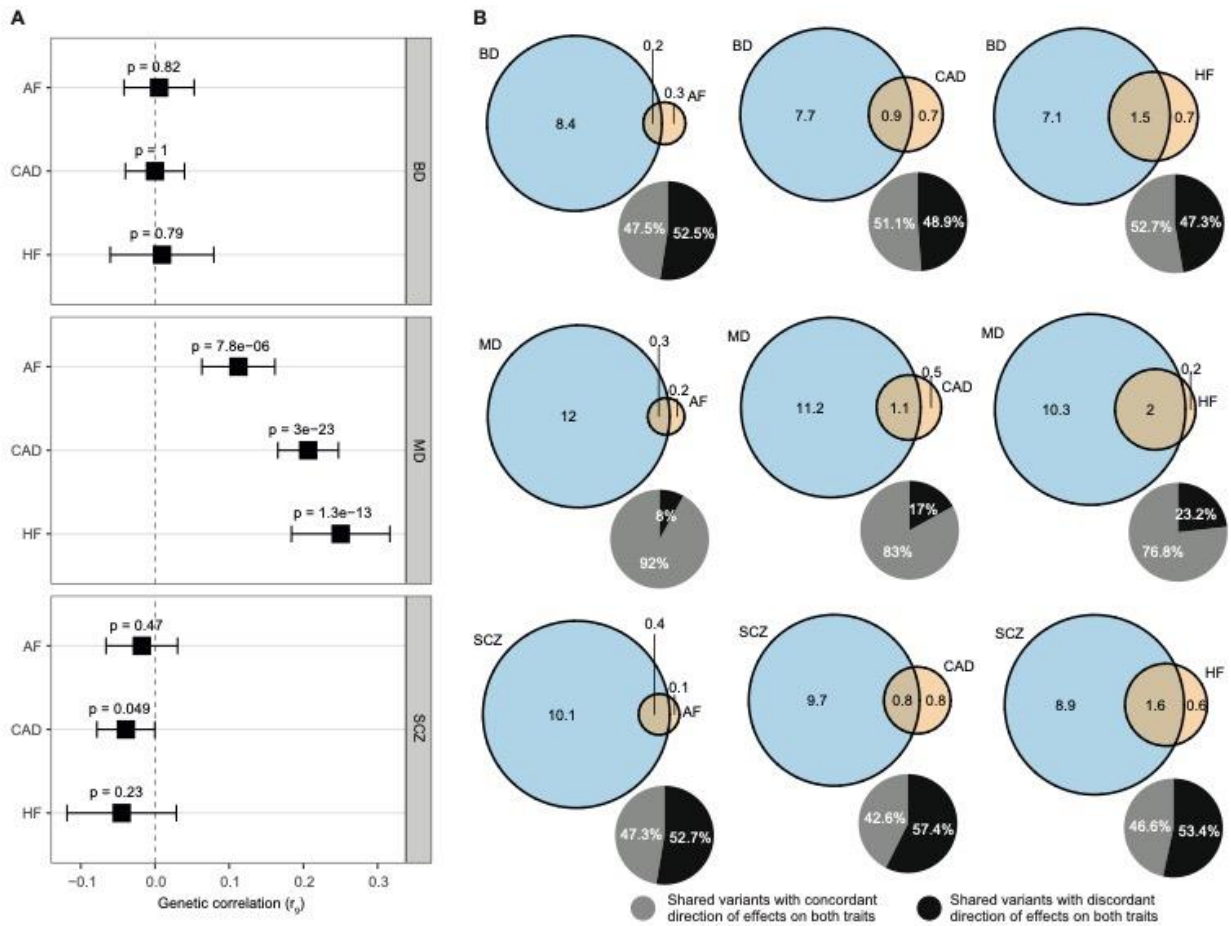

2  
 3 Figure 1. MD exhibits significant genetic correlation and polygenic overlap with CVDs. (A)  
 4 Genetic correlations ( $r_g$ ) between the three psychiatric disorders and three CVDs analysed in this  
 5 study. The dotted line indicates a lack of genetic correlation ( $r_g = 0$ ). Error bars indicate 95%  
 6 confidence interval for the  $r_g$  estimates, and the corresponding p-values are shown. (B) Polygenic  
 7 overlaps between psychiatric disorders and CVDs. The Venn diagrams show the number  
 8 (thousands) of trait-associated variants specific to each psychiatric disorder (blue), specific to each  
 9 CVD (yellow), and shared by a pair of psychiatric disorder and CVD (overlap), as estimated by  
 10 MiXeR. The pie charts show the percentages of shared variants (corresponding to the overlapped  
 11 region in the relevant Venn diagram) that confer concordant (grey) and discordant (black)  
 12 directions of effects on both traits. AF, atrial fibrillation; BD, bipolar disorder; CAD, coronary  
 13 artery disease; CVD, cardiovascular disease; HF, heart failure;  $r_g$ , genetic correlation; MD, major  
 14 depression; SCZ, schizophrenia.

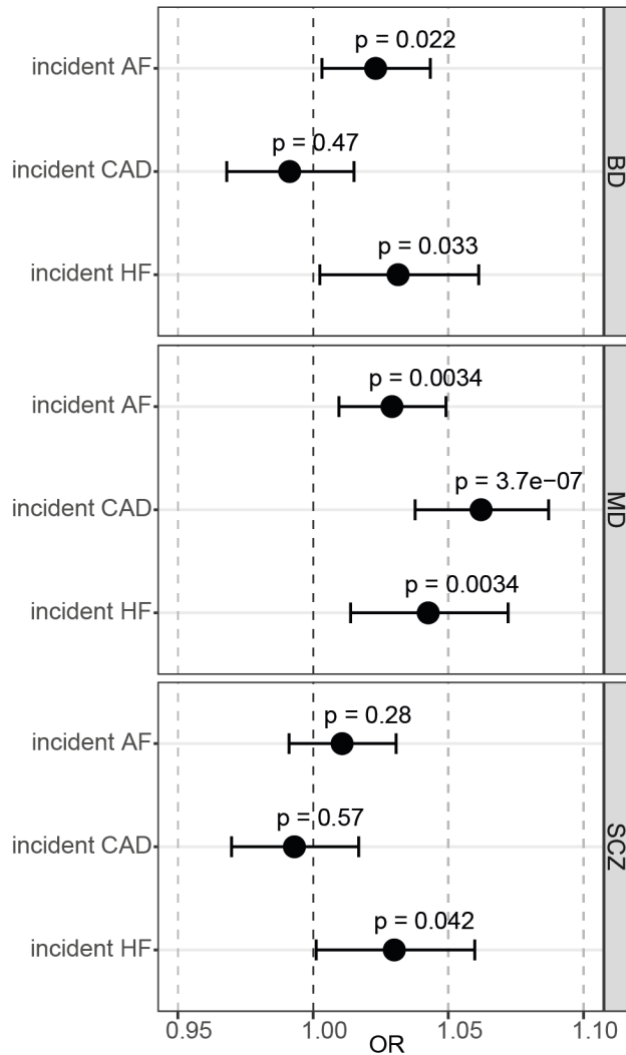

1  
2 Figure 2. Association between psychiatric disorder PGSs and incident CVDs in the UK Biobank  
3 cohort. Associations were estimated with logistic regressions. X-axis shows the OR per SD  
4 increase in PGS, with p-values labelled, and error bars indicate 95% confidence intervals. Dark  
5 grey line indicates OR of 1. AF, atrial fibrillation; BD, bipolar disorder; CAD, coronary artery  
6 disease; HF, heart failure; MD, major depression; OR, odds ratio; SCZ, schizophrenia.

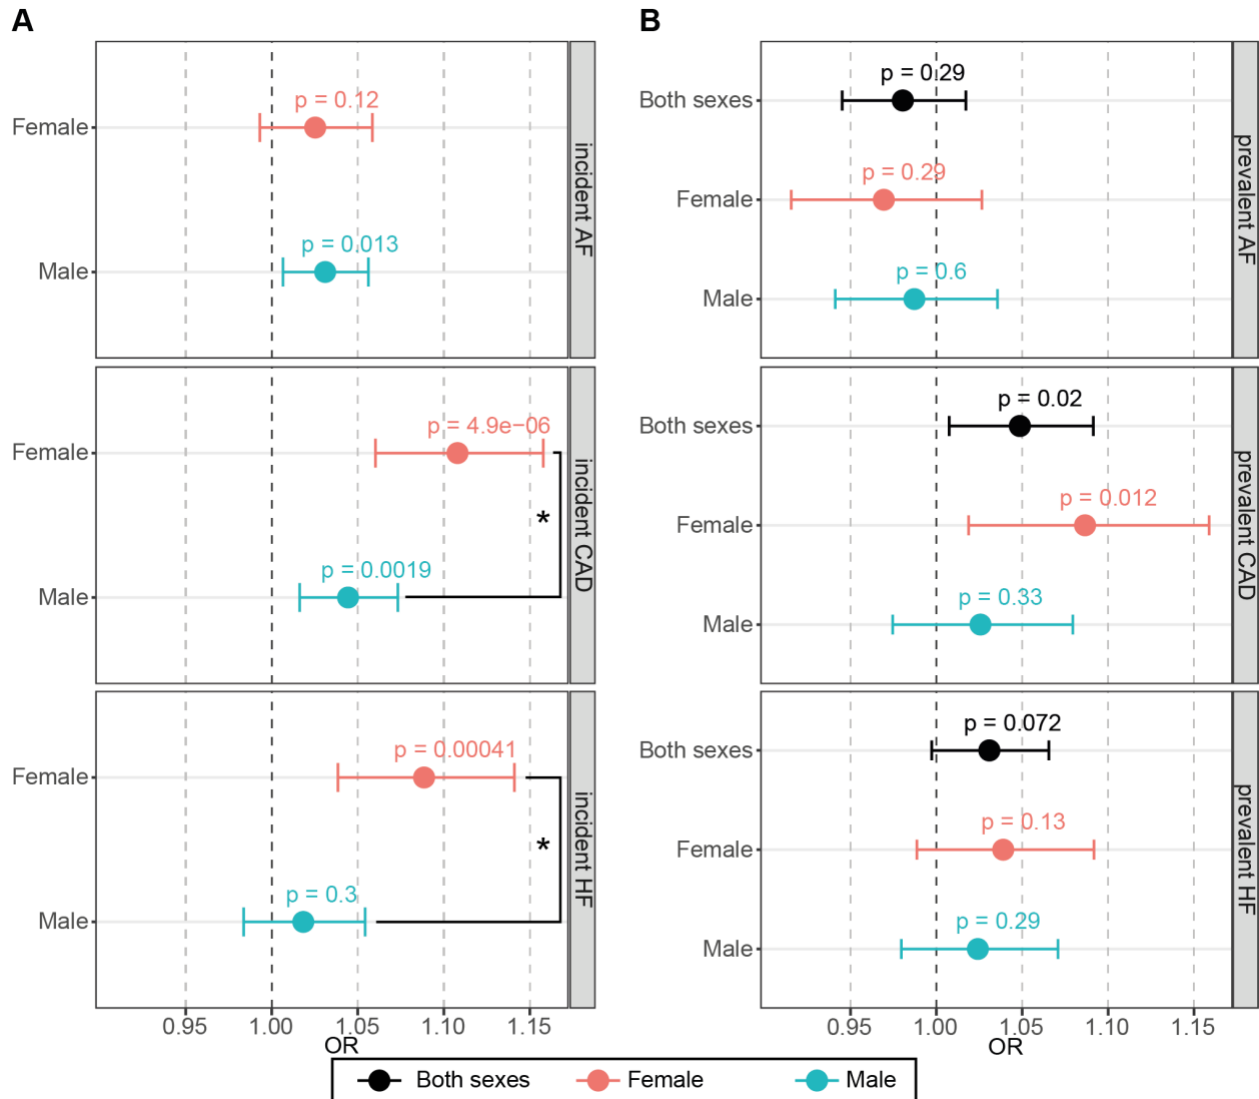

1  
2 Figure 3. Sex-stratified association between MD PGS and incident CVDs. (A) Sex-stratified  
3 associations between PGS<sub>MD</sub> and incident CVDs (red - female; blue - male) in the UK Biobank  
4 cohort. Asterisk (\*) indicates a statistically significant difference (two-sided Wald test  $p < 0.05$ )  
5 in the log(OR) values between females and males. (B) Overall and sex-stratified associations  
6 between PGS<sub>MD</sub> and incident CVDs in the BioVU cohort. Associations were estimated with  
7 logistic regressions. X-axis shows the OR per SD increase in PGS, with p-values labelled, and  
8 error bars indicate 95% confidence intervals. Dark grey line indicates OR of 1. AF, atrial  
9 fibrillation; CAD, coronary artery disease; HF, heart failure; OR, odds ratio.



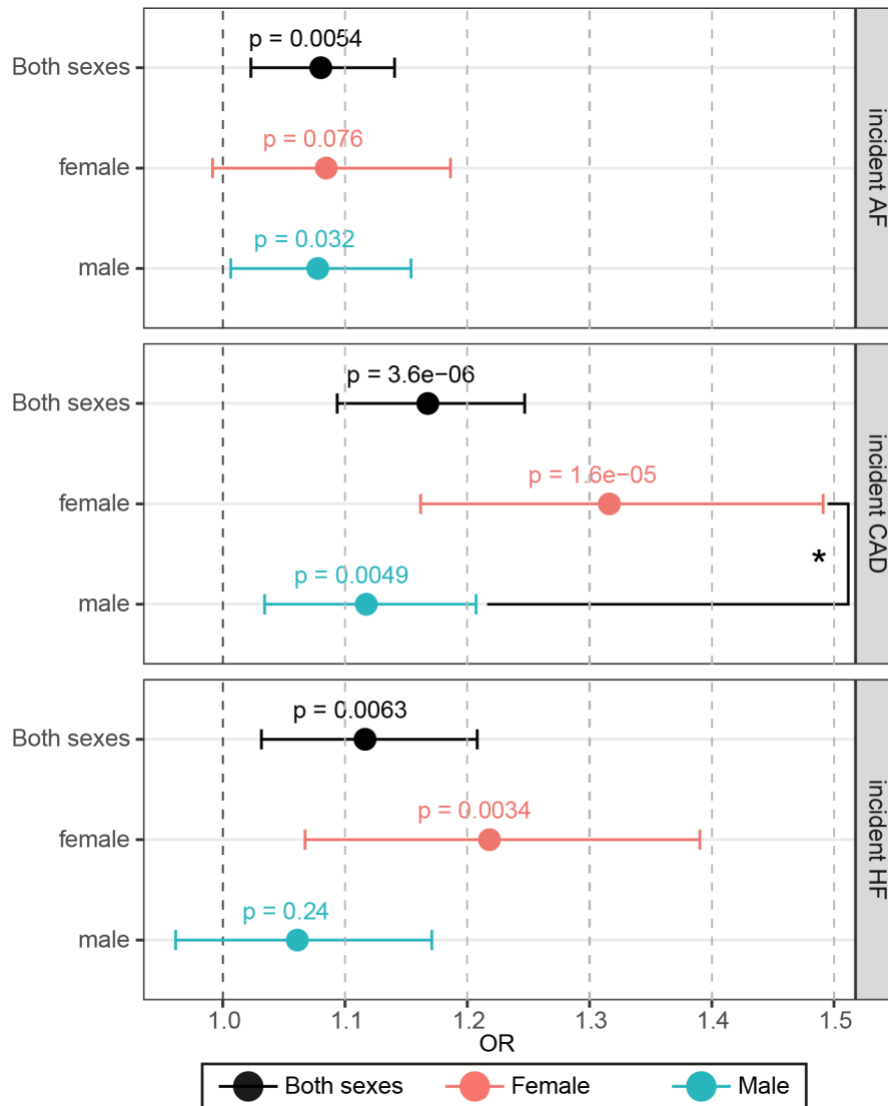

1  
 2 Figure 4. Association with incident CVDs for individuals in the top PGS<sub>MD</sub> quartile (25%),  
 3 compared to the bottom quartile. The ORs of CVDs are shown for the overall (black) and sex-  
 4 stratified cohorts (red - female; blue - male) of UK Biobank. Associations were estimated with  
 5 logistic regressions. X-axis shows the OR in the high-risk group versus the low-risk group, with  
 6 p-values labelled, and error bars indicate 95% confidence intervals. Asterisk (\*) indicates a  
 7 statistically significant difference (two-sided Wald test  $p < 0.05$ ) in the  $\log(\text{OR})$  values between  
 8 females and males. Dark grey line indicates OR of 1. AF, atrial fibrillation; CAD, coronary artery  
 9 disease; HF, heart failure; OR, odds ratio.

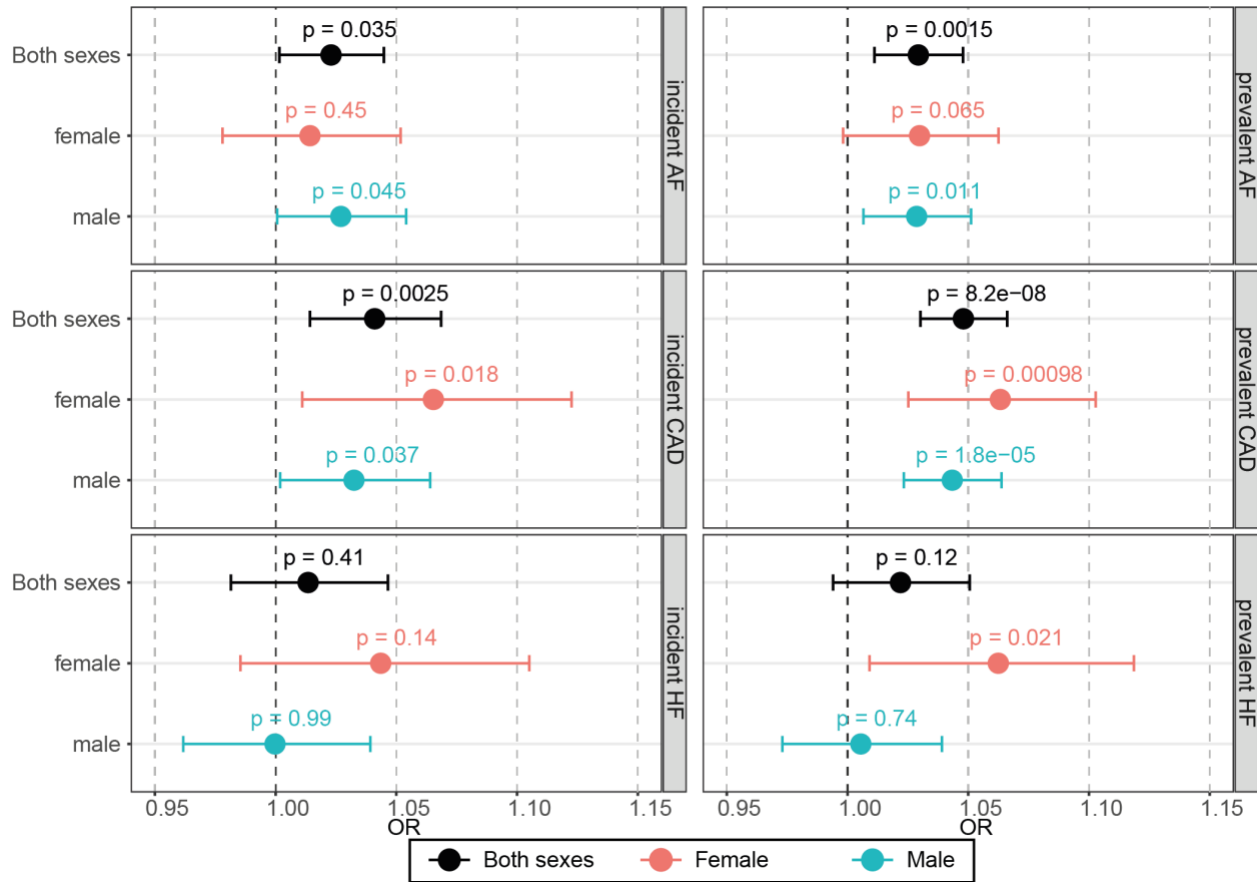

1  
 2 Figure 5. Association between PGS<sub>MD</sub> and CVDs amongst UK Biobank individuals with no  
 3 diagnosis of psychiatric disorders and psychiatric medications. The associations of PGS<sub>MD</sub> with  
 4 incident (left) or prevalent (right) CVDs are shown for the overall (black) and sex-stratified cohorts  
 5 (red - female; blue - male). Associations were estimated with logistic regressions. X-axis shows  
 6 the OR per SD increase in PGS, with p-values labelled, and error bars indicate 95% confidence  
 7 intervals. Dark grey line indicates OR of 1. AF, atrial fibrillation; CAD, coronary artery disease;  
 8 HF, heart failure; OR, odds ratio.

9

1 **Supplementary Material**

2 of

3 **A higher genetic risk for depression is a greater risk factor for cardiovascular disease in**  
4 **women**

5 Jiayue-Clara Jiang (PhD)<sup>1\*</sup>, Kritika Singh (BA)<sup>2,3\*</sup>, Lea K. Davis (PhD)<sup>2,3,4,5,6</sup>, Naomi R. Wray  
6 (PhD)<sup>1,7</sup>, Sonia Shah (PhD)<sup>1</sup>

7 <sup>1</sup> Institute for Molecular Bioscience, The University of Queensland, St Lucia, 4072, Australia

8 <sup>2</sup> Division of Genetic Medicine, Department of Medicine, Vanderbilt University Medical Center,  
9 Nashville, TN, 37232, USA

10 <sup>3</sup> Vanderbilt Genetics Institute, Vanderbilt University Medical Center, Nashville, TN, 37232, USA

11 <sup>4</sup> Department of Molecular Physiology and Biophysics, Vanderbilt University Medical Center,  
12 Nashville, TN, 37232, USA

13 <sup>5</sup> Department of Psychiatry and Behavioral Sciences, Vanderbilt University Medical Center,  
14 Nashville, TN, 37232, USA

15 <sup>6</sup> Departments of Medicine and Biomedical Informatics, Vanderbilt University Medical Center,  
16 Nashville, TN, 37232, USA

17 <sup>7</sup> Queensland Brain Institute, The University of Queensland, St Lucia, 4072, Australia

18  
19 \*co first authors

20

1 **Supplementary Methods**

2 **UK Biobank cohort quality control**

3 Quality control was performed on the UK Biobank cohort to remove individuals who were outliers  
4 for heterozygosity and missing rate, were excluded from kinship inference, showed evidence of  
5 putative sex chromosome aneuploidy, showed mismatching self-reported and genetically inferred  
6 sex, or have withdrawn from the study (definitions of exclusion criteria are described in Bycroft  
7 et al. <sup>19</sup>). Individuals who have missing phenotypes [BMI or smoking status] were also excluded  
8 from the analysis. A total of 345,340 individuals from the UK Biobank cohort were included in  
9 the final analysis.

10 **Genetic correlation and polygenic overlap**

11 Two traits are said to have polygenic overlap if they share genetic variants that have non-zero  
12 effects on both traits. The genetic correlation between two traits, estimated using LDSC <sup>21</sup>,  
13 indicates whether the shared genetic variants conferred predominantly the same or opposite effect  
14 directions with both traits. For example, a positive genetic correlation between trait 1 and trait 2  
15 indicates that genetic variants that increase the value of trait 1 predominantly also increases the  
16 value of trait 2 (i.e. concordant effect directions) (Scenario B in Supplementary Figure 1). In  
17 contrast, a negative genetic correlation indicates that genetic variants that increase the value of  
18 trait 1 predominantly decrease the value of trait 2 (i.e. discordant effect directions) (Scenario C in  
19 Supplementary Figure 1).

20 The lack of genetic correlation between two traits can be attributed to two scenarios, where the  
21 first scenario is that the two traits share no genetic variants (i.e. no polygenic overlap) (Scenario

1 A in Supplementary Figure 1). In this scenario, genetic variants that increase the value of trait 1  
2 does not influence the value of trait 2, and vice versa. The other scenario is that the two traits do  
3 share some genetic variants (polygenic overlap); however, these shared genetic variants conferred  
4 a mixture of effect directions on the two traits (Scenario D in Supplementary Figure 1). In this  
5 scenario, there is a balance of shared genetic variants that confer concordant effect directions on  
6 both traits, and variants with discordant effect directions. As a result of the mixture of effect  
7 directions cancelling each other out, the two traits exhibit minimal genetic correlation. For  
8 example, while schizophrenia and educational attainment show minimal genetic correlation,  
9 genetic studies have identified many genetic variants to be jointly associated with both traits,  
10 providing an example of two traits with polygenic overlap yet no genetic correlation <sup>22</sup>.

## 11 **MiXeR**

12 MiXeR is used to estimate the fraction of shared genetic variants, or the degree of polygenic  
13 overlap between a pair of traits <sup>22</sup>. Rather than identifying the exact locations of shared genetic  
14 variants, MiXeR partitions genetic variants into four categories based on their effects on the trait  
15 pair, specifically

- 16 1. Genetic variants with no effect on either trait
- 17 2. Genetic variants with effects on trait 1 only, but no effects on trait 2
- 18 3. Genetic variants with effects on trait 2 only, but no effects on trait 1
- 19 4. Genetic variants with effects on both traits (shared genetic variants)

1 MiXeR fits a bivariate Gaussian mixture model to estimate the fraction of genetic variants that  
2 follow each of the four components above. The fraction of shared genetic variants is then  
3 multiplied by the total number of genetic variants in the reference panel to give the estimated  
4 number of shared genetic variants. In addition, as part of the model, MiXeR also estimates the  
5 proportion of shared genetic variants that confer concordant and discordant effect directions on the  
6 two traits under consideration.

7 In the original MiXeR paper by Frei et al. <sup>22</sup>, genetic variants are referred to as “causal” for a trait  
8 if they confer a non-zero effect on the trait, regardless of the magnitude of the effect sizes.  
9 However, as acknowledged by Frei et al. <sup>22</sup>, it is preferred that only genetic variants with  
10 sufficiently large effect sizes to be referred to as “causal variants”. Therefore, to avoid confusion  
11 with genetic variants that reach genome-wide significance, in this paper we refer to genetic variants  
12 that are identified by MiXeR to have non-zero effects as “trait-associated variants”.

1 **Supplementary Figures**

|                                     | Scenario A                                                                                                                                                                                                                                                                                                                                                                                                                                                                                                                                                                                                                                                                                                    | Scenario B                                                                        | Scenario C                                                                         | Scenario D                                                                          |   |                |    |   |                |    |   |                |    |   |                |    |   |                |    |    |                |   |    |                |   |    |                |   |    |                |   |    |                 |   |   |  |  |                                                                                                                                                                                                                                                                                                                                                                                                                                                                                                                                                                                                                                                                                                     |         |  |         |   |                |   |   |                |   |   |                |   |   |                |   |   |                |   |   |                |   |   |                |   |   |                |   |   |                |   |   |                 |   |   |  |  |                                                                                                                                                                                                                                                                                                                                                                                                                                                                                                                                                                                                                                                                                                     |         |  |         |   |                |   |   |                |   |   |                |   |   |                |   |   |                |   |   |                |   |   |                |   |   |                |   |   |                |   |   |                 |   |   |  |  |                                                                                                                                                                                                                                                                                                                                                                                                                                                                                                                                                                                                                                                                                                     |         |  |         |   |                |   |   |                |   |   |                |   |   |                |   |   |                |   |   |                |   |   |                |   |   |                |   |   |                |   |   |                 |   |   |  |  |
|-------------------------------------|---------------------------------------------------------------------------------------------------------------------------------------------------------------------------------------------------------------------------------------------------------------------------------------------------------------------------------------------------------------------------------------------------------------------------------------------------------------------------------------------------------------------------------------------------------------------------------------------------------------------------------------------------------------------------------------------------------------|-----------------------------------------------------------------------------------|------------------------------------------------------------------------------------|-------------------------------------------------------------------------------------|---|----------------|----|---|----------------|----|---|----------------|----|---|----------------|----|---|----------------|----|----|----------------|---|----|----------------|---|----|----------------|---|----|----------------|---|----|-----------------|---|---|--|--|-----------------------------------------------------------------------------------------------------------------------------------------------------------------------------------------------------------------------------------------------------------------------------------------------------------------------------------------------------------------------------------------------------------------------------------------------------------------------------------------------------------------------------------------------------------------------------------------------------------------------------------------------------------------------------------------------------|---------|--|---------|---|----------------|---|---|----------------|---|---|----------------|---|---|----------------|---|---|----------------|---|---|----------------|---|---|----------------|---|---|----------------|---|---|----------------|---|---|-----------------|---|---|--|--|-----------------------------------------------------------------------------------------------------------------------------------------------------------------------------------------------------------------------------------------------------------------------------------------------------------------------------------------------------------------------------------------------------------------------------------------------------------------------------------------------------------------------------------------------------------------------------------------------------------------------------------------------------------------------------------------------------|---------|--|---------|---|----------------|---|---|----------------|---|---|----------------|---|---|----------------|---|---|----------------|---|---|----------------|---|---|----------------|---|---|----------------|---|---|----------------|---|---|-----------------|---|---|--|--|-----------------------------------------------------------------------------------------------------------------------------------------------------------------------------------------------------------------------------------------------------------------------------------------------------------------------------------------------------------------------------------------------------------------------------------------------------------------------------------------------------------------------------------------------------------------------------------------------------------------------------------------------------------------------------------------------------|---------|--|---------|---|----------------|---|---|----------------|---|---|----------------|---|---|----------------|---|---|----------------|---|---|----------------|---|---|----------------|---|---|----------------|---|---|----------------|---|---|-----------------|---|---|--|--|
|                                     | <table border="1"> <thead> <tr> <th>Trait 1</th> <th></th> <th>Trait 2</th> </tr> </thead> <tbody> <tr><td>+</td><td>V<sub>1</sub></td><td>NA</td></tr> <tr><td>+</td><td>V<sub>2</sub></td><td>NA</td></tr> <tr><td>+</td><td>V<sub>3</sub></td><td>NA</td></tr> <tr><td>+</td><td>V<sub>4</sub></td><td>NA</td></tr> <tr><td>+</td><td>V<sub>5</sub></td><td>NA</td></tr> <tr><td>NA</td><td>V<sub>6</sub></td><td>+</td></tr> <tr><td>NA</td><td>V<sub>7</sub></td><td>+</td></tr> <tr><td>NA</td><td>V<sub>8</sub></td><td>+</td></tr> <tr><td>NA</td><td>V<sub>9</sub></td><td>+</td></tr> <tr><td>NA</td><td>V<sub>10</sub></td><td>+</td></tr> <tr><td>⋮</td><td></td><td></td></tr> </tbody> </table> | Trait 1                                                                           |                                                                                    | Trait 2                                                                             | + | V <sub>1</sub> | NA | + | V <sub>2</sub> | NA | + | V <sub>3</sub> | NA | + | V <sub>4</sub> | NA | + | V <sub>5</sub> | NA | NA | V <sub>6</sub> | + | NA | V <sub>7</sub> | + | NA | V <sub>8</sub> | + | NA | V <sub>9</sub> | + | NA | V <sub>10</sub> | + | ⋮ |  |  | <table border="1"> <thead> <tr> <th>Trait 1</th> <th></th> <th>Trait 2</th> </tr> </thead> <tbody> <tr><td>+</td><td>V<sub>1</sub></td><td>+</td></tr> <tr><td>+</td><td>V<sub>2</sub></td><td>+</td></tr> <tr><td>+</td><td>V<sub>3</sub></td><td>+</td></tr> <tr><td>+</td><td>V<sub>4</sub></td><td>-</td></tr> <tr><td>+</td><td>V<sub>5</sub></td><td>+</td></tr> <tr><td>+</td><td>V<sub>6</sub></td><td>+</td></tr> <tr><td>+</td><td>V<sub>7</sub></td><td>+</td></tr> <tr><td>+</td><td>V<sub>8</sub></td><td>+</td></tr> <tr><td>+</td><td>V<sub>9</sub></td><td>-</td></tr> <tr><td>+</td><td>V<sub>10</sub></td><td>+</td></tr> <tr><td>⋮</td><td></td><td></td></tr> </tbody> </table> | Trait 1 |  | Trait 2 | + | V <sub>1</sub> | + | + | V <sub>2</sub> | + | + | V <sub>3</sub> | + | + | V <sub>4</sub> | - | + | V <sub>5</sub> | + | + | V <sub>6</sub> | + | + | V <sub>7</sub> | + | + | V <sub>8</sub> | + | + | V <sub>9</sub> | - | + | V <sub>10</sub> | + | ⋮ |  |  | <table border="1"> <thead> <tr> <th>Trait 1</th> <th></th> <th>Trait 2</th> </tr> </thead> <tbody> <tr><td>+</td><td>V<sub>1</sub></td><td>-</td></tr> <tr><td>+</td><td>V<sub>2</sub></td><td>-</td></tr> <tr><td>+</td><td>V<sub>3</sub></td><td>+</td></tr> <tr><td>+</td><td>V<sub>4</sub></td><td>-</td></tr> <tr><td>+</td><td>V<sub>5</sub></td><td>-</td></tr> <tr><td>+</td><td>V<sub>6</sub></td><td>-</td></tr> <tr><td>+</td><td>V<sub>7</sub></td><td>-</td></tr> <tr><td>+</td><td>V<sub>8</sub></td><td>-</td></tr> <tr><td>+</td><td>V<sub>9</sub></td><td>-</td></tr> <tr><td>+</td><td>V<sub>10</sub></td><td>+</td></tr> <tr><td>⋮</td><td></td><td></td></tr> </tbody> </table> | Trait 1 |  | Trait 2 | + | V <sub>1</sub> | - | + | V <sub>2</sub> | - | + | V <sub>3</sub> | + | + | V <sub>4</sub> | - | + | V <sub>5</sub> | - | + | V <sub>6</sub> | - | + | V <sub>7</sub> | - | + | V <sub>8</sub> | - | + | V <sub>9</sub> | - | + | V <sub>10</sub> | + | ⋮ |  |  | <table border="1"> <thead> <tr> <th>Trait 1</th> <th></th> <th>Trait 2</th> </tr> </thead> <tbody> <tr><td>+</td><td>V<sub>1</sub></td><td>-</td></tr> <tr><td>+</td><td>V<sub>2</sub></td><td>-</td></tr> <tr><td>+</td><td>V<sub>3</sub></td><td>-</td></tr> <tr><td>+</td><td>V<sub>4</sub></td><td>-</td></tr> <tr><td>+</td><td>V<sub>5</sub></td><td>-</td></tr> <tr><td>+</td><td>V<sub>6</sub></td><td>+</td></tr> <tr><td>+</td><td>V<sub>7</sub></td><td>+</td></tr> <tr><td>+</td><td>V<sub>8</sub></td><td>+</td></tr> <tr><td>+</td><td>V<sub>9</sub></td><td>+</td></tr> <tr><td>+</td><td>V<sub>10</sub></td><td>+</td></tr> <tr><td>⋮</td><td></td><td></td></tr> </tbody> </table> | Trait 1 |  | Trait 2 | + | V <sub>1</sub> | - | + | V <sub>2</sub> | - | + | V <sub>3</sub> | - | + | V <sub>4</sub> | - | + | V <sub>5</sub> | - | + | V <sub>6</sub> | + | + | V <sub>7</sub> | + | + | V <sub>8</sub> | + | + | V <sub>9</sub> | + | + | V <sub>10</sub> | + | ⋮ |  |  |
| Trait 1                             |                                                                                                                                                                                                                                                                                                                                                                                                                                                                                                                                                                                                                                                                                                               | Trait 2                                                                           |                                                                                    |                                                                                     |   |                |    |   |                |    |   |                |    |   |                |    |   |                |    |    |                |   |    |                |   |    |                |   |    |                |   |    |                 |   |   |  |  |                                                                                                                                                                                                                                                                                                                                                                                                                                                                                                                                                                                                                                                                                                     |         |  |         |   |                |   |   |                |   |   |                |   |   |                |   |   |                |   |   |                |   |   |                |   |   |                |   |   |                |   |   |                 |   |   |  |  |                                                                                                                                                                                                                                                                                                                                                                                                                                                                                                                                                                                                                                                                                                     |         |  |         |   |                |   |   |                |   |   |                |   |   |                |   |   |                |   |   |                |   |   |                |   |   |                |   |   |                |   |   |                 |   |   |  |  |                                                                                                                                                                                                                                                                                                                                                                                                                                                                                                                                                                                                                                                                                                     |         |  |         |   |                |   |   |                |   |   |                |   |   |                |   |   |                |   |   |                |   |   |                |   |   |                |   |   |                |   |   |                 |   |   |  |  |
| +                                   | V <sub>1</sub>                                                                                                                                                                                                                                                                                                                                                                                                                                                                                                                                                                                                                                                                                                | NA                                                                                |                                                                                    |                                                                                     |   |                |    |   |                |    |   |                |    |   |                |    |   |                |    |    |                |   |    |                |   |    |                |   |    |                |   |    |                 |   |   |  |  |                                                                                                                                                                                                                                                                                                                                                                                                                                                                                                                                                                                                                                                                                                     |         |  |         |   |                |   |   |                |   |   |                |   |   |                |   |   |                |   |   |                |   |   |                |   |   |                |   |   |                |   |   |                 |   |   |  |  |                                                                                                                                                                                                                                                                                                                                                                                                                                                                                                                                                                                                                                                                                                     |         |  |         |   |                |   |   |                |   |   |                |   |   |                |   |   |                |   |   |                |   |   |                |   |   |                |   |   |                |   |   |                 |   |   |  |  |                                                                                                                                                                                                                                                                                                                                                                                                                                                                                                                                                                                                                                                                                                     |         |  |         |   |                |   |   |                |   |   |                |   |   |                |   |   |                |   |   |                |   |   |                |   |   |                |   |   |                |   |   |                 |   |   |  |  |
| +                                   | V <sub>2</sub>                                                                                                                                                                                                                                                                                                                                                                                                                                                                                                                                                                                                                                                                                                | NA                                                                                |                                                                                    |                                                                                     |   |                |    |   |                |    |   |                |    |   |                |    |   |                |    |    |                |   |    |                |   |    |                |   |    |                |   |    |                 |   |   |  |  |                                                                                                                                                                                                                                                                                                                                                                                                                                                                                                                                                                                                                                                                                                     |         |  |         |   |                |   |   |                |   |   |                |   |   |                |   |   |                |   |   |                |   |   |                |   |   |                |   |   |                |   |   |                 |   |   |  |  |                                                                                                                                                                                                                                                                                                                                                                                                                                                                                                                                                                                                                                                                                                     |         |  |         |   |                |   |   |                |   |   |                |   |   |                |   |   |                |   |   |                |   |   |                |   |   |                |   |   |                |   |   |                 |   |   |  |  |                                                                                                                                                                                                                                                                                                                                                                                                                                                                                                                                                                                                                                                                                                     |         |  |         |   |                |   |   |                |   |   |                |   |   |                |   |   |                |   |   |                |   |   |                |   |   |                |   |   |                |   |   |                 |   |   |  |  |
| +                                   | V <sub>3</sub>                                                                                                                                                                                                                                                                                                                                                                                                                                                                                                                                                                                                                                                                                                | NA                                                                                |                                                                                    |                                                                                     |   |                |    |   |                |    |   |                |    |   |                |    |   |                |    |    |                |   |    |                |   |    |                |   |    |                |   |    |                 |   |   |  |  |                                                                                                                                                                                                                                                                                                                                                                                                                                                                                                                                                                                                                                                                                                     |         |  |         |   |                |   |   |                |   |   |                |   |   |                |   |   |                |   |   |                |   |   |                |   |   |                |   |   |                |   |   |                 |   |   |  |  |                                                                                                                                                                                                                                                                                                                                                                                                                                                                                                                                                                                                                                                                                                     |         |  |         |   |                |   |   |                |   |   |                |   |   |                |   |   |                |   |   |                |   |   |                |   |   |                |   |   |                |   |   |                 |   |   |  |  |                                                                                                                                                                                                                                                                                                                                                                                                                                                                                                                                                                                                                                                                                                     |         |  |         |   |                |   |   |                |   |   |                |   |   |                |   |   |                |   |   |                |   |   |                |   |   |                |   |   |                |   |   |                 |   |   |  |  |
| +                                   | V <sub>4</sub>                                                                                                                                                                                                                                                                                                                                                                                                                                                                                                                                                                                                                                                                                                | NA                                                                                |                                                                                    |                                                                                     |   |                |    |   |                |    |   |                |    |   |                |    |   |                |    |    |                |   |    |                |   |    |                |   |    |                |   |    |                 |   |   |  |  |                                                                                                                                                                                                                                                                                                                                                                                                                                                                                                                                                                                                                                                                                                     |         |  |         |   |                |   |   |                |   |   |                |   |   |                |   |   |                |   |   |                |   |   |                |   |   |                |   |   |                |   |   |                 |   |   |  |  |                                                                                                                                                                                                                                                                                                                                                                                                                                                                                                                                                                                                                                                                                                     |         |  |         |   |                |   |   |                |   |   |                |   |   |                |   |   |                |   |   |                |   |   |                |   |   |                |   |   |                |   |   |                 |   |   |  |  |                                                                                                                                                                                                                                                                                                                                                                                                                                                                                                                                                                                                                                                                                                     |         |  |         |   |                |   |   |                |   |   |                |   |   |                |   |   |                |   |   |                |   |   |                |   |   |                |   |   |                |   |   |                 |   |   |  |  |
| +                                   | V <sub>5</sub>                                                                                                                                                                                                                                                                                                                                                                                                                                                                                                                                                                                                                                                                                                | NA                                                                                |                                                                                    |                                                                                     |   |                |    |   |                |    |   |                |    |   |                |    |   |                |    |    |                |   |    |                |   |    |                |   |    |                |   |    |                 |   |   |  |  |                                                                                                                                                                                                                                                                                                                                                                                                                                                                                                                                                                                                                                                                                                     |         |  |         |   |                |   |   |                |   |   |                |   |   |                |   |   |                |   |   |                |   |   |                |   |   |                |   |   |                |   |   |                 |   |   |  |  |                                                                                                                                                                                                                                                                                                                                                                                                                                                                                                                                                                                                                                                                                                     |         |  |         |   |                |   |   |                |   |   |                |   |   |                |   |   |                |   |   |                |   |   |                |   |   |                |   |   |                |   |   |                 |   |   |  |  |                                                                                                                                                                                                                                                                                                                                                                                                                                                                                                                                                                                                                                                                                                     |         |  |         |   |                |   |   |                |   |   |                |   |   |                |   |   |                |   |   |                |   |   |                |   |   |                |   |   |                |   |   |                 |   |   |  |  |
| NA                                  | V <sub>6</sub>                                                                                                                                                                                                                                                                                                                                                                                                                                                                                                                                                                                                                                                                                                | +                                                                                 |                                                                                    |                                                                                     |   |                |    |   |                |    |   |                |    |   |                |    |   |                |    |    |                |   |    |                |   |    |                |   |    |                |   |    |                 |   |   |  |  |                                                                                                                                                                                                                                                                                                                                                                                                                                                                                                                                                                                                                                                                                                     |         |  |         |   |                |   |   |                |   |   |                |   |   |                |   |   |                |   |   |                |   |   |                |   |   |                |   |   |                |   |   |                 |   |   |  |  |                                                                                                                                                                                                                                                                                                                                                                                                                                                                                                                                                                                                                                                                                                     |         |  |         |   |                |   |   |                |   |   |                |   |   |                |   |   |                |   |   |                |   |   |                |   |   |                |   |   |                |   |   |                 |   |   |  |  |                                                                                                                                                                                                                                                                                                                                                                                                                                                                                                                                                                                                                                                                                                     |         |  |         |   |                |   |   |                |   |   |                |   |   |                |   |   |                |   |   |                |   |   |                |   |   |                |   |   |                |   |   |                 |   |   |  |  |
| NA                                  | V <sub>7</sub>                                                                                                                                                                                                                                                                                                                                                                                                                                                                                                                                                                                                                                                                                                | +                                                                                 |                                                                                    |                                                                                     |   |                |    |   |                |    |   |                |    |   |                |    |   |                |    |    |                |   |    |                |   |    |                |   |    |                |   |    |                 |   |   |  |  |                                                                                                                                                                                                                                                                                                                                                                                                                                                                                                                                                                                                                                                                                                     |         |  |         |   |                |   |   |                |   |   |                |   |   |                |   |   |                |   |   |                |   |   |                |   |   |                |   |   |                |   |   |                 |   |   |  |  |                                                                                                                                                                                                                                                                                                                                                                                                                                                                                                                                                                                                                                                                                                     |         |  |         |   |                |   |   |                |   |   |                |   |   |                |   |   |                |   |   |                |   |   |                |   |   |                |   |   |                |   |   |                 |   |   |  |  |                                                                                                                                                                                                                                                                                                                                                                                                                                                                                                                                                                                                                                                                                                     |         |  |         |   |                |   |   |                |   |   |                |   |   |                |   |   |                |   |   |                |   |   |                |   |   |                |   |   |                |   |   |                 |   |   |  |  |
| NA                                  | V <sub>8</sub>                                                                                                                                                                                                                                                                                                                                                                                                                                                                                                                                                                                                                                                                                                | +                                                                                 |                                                                                    |                                                                                     |   |                |    |   |                |    |   |                |    |   |                |    |   |                |    |    |                |   |    |                |   |    |                |   |    |                |   |    |                 |   |   |  |  |                                                                                                                                                                                                                                                                                                                                                                                                                                                                                                                                                                                                                                                                                                     |         |  |         |   |                |   |   |                |   |   |                |   |   |                |   |   |                |   |   |                |   |   |                |   |   |                |   |   |                |   |   |                 |   |   |  |  |                                                                                                                                                                                                                                                                                                                                                                                                                                                                                                                                                                                                                                                                                                     |         |  |         |   |                |   |   |                |   |   |                |   |   |                |   |   |                |   |   |                |   |   |                |   |   |                |   |   |                |   |   |                 |   |   |  |  |                                                                                                                                                                                                                                                                                                                                                                                                                                                                                                                                                                                                                                                                                                     |         |  |         |   |                |   |   |                |   |   |                |   |   |                |   |   |                |   |   |                |   |   |                |   |   |                |   |   |                |   |   |                 |   |   |  |  |
| NA                                  | V <sub>9</sub>                                                                                                                                                                                                                                                                                                                                                                                                                                                                                                                                                                                                                                                                                                | +                                                                                 |                                                                                    |                                                                                     |   |                |    |   |                |    |   |                |    |   |                |    |   |                |    |    |                |   |    |                |   |    |                |   |    |                |   |    |                 |   |   |  |  |                                                                                                                                                                                                                                                                                                                                                                                                                                                                                                                                                                                                                                                                                                     |         |  |         |   |                |   |   |                |   |   |                |   |   |                |   |   |                |   |   |                |   |   |                |   |   |                |   |   |                |   |   |                 |   |   |  |  |                                                                                                                                                                                                                                                                                                                                                                                                                                                                                                                                                                                                                                                                                                     |         |  |         |   |                |   |   |                |   |   |                |   |   |                |   |   |                |   |   |                |   |   |                |   |   |                |   |   |                |   |   |                 |   |   |  |  |                                                                                                                                                                                                                                                                                                                                                                                                                                                                                                                                                                                                                                                                                                     |         |  |         |   |                |   |   |                |   |   |                |   |   |                |   |   |                |   |   |                |   |   |                |   |   |                |   |   |                |   |   |                 |   |   |  |  |
| NA                                  | V <sub>10</sub>                                                                                                                                                                                                                                                                                                                                                                                                                                                                                                                                                                                                                                                                                               | +                                                                                 |                                                                                    |                                                                                     |   |                |    |   |                |    |   |                |    |   |                |    |   |                |    |    |                |   |    |                |   |    |                |   |    |                |   |    |                 |   |   |  |  |                                                                                                                                                                                                                                                                                                                                                                                                                                                                                                                                                                                                                                                                                                     |         |  |         |   |                |   |   |                |   |   |                |   |   |                |   |   |                |   |   |                |   |   |                |   |   |                |   |   |                |   |   |                 |   |   |  |  |                                                                                                                                                                                                                                                                                                                                                                                                                                                                                                                                                                                                                                                                                                     |         |  |         |   |                |   |   |                |   |   |                |   |   |                |   |   |                |   |   |                |   |   |                |   |   |                |   |   |                |   |   |                 |   |   |  |  |                                                                                                                                                                                                                                                                                                                                                                                                                                                                                                                                                                                                                                                                                                     |         |  |         |   |                |   |   |                |   |   |                |   |   |                |   |   |                |   |   |                |   |   |                |   |   |                |   |   |                |   |   |                 |   |   |  |  |
| ⋮                                   |                                                                                                                                                                                                                                                                                                                                                                                                                                                                                                                                                                                                                                                                                                               |                                                                                   |                                                                                    |                                                                                     |   |                |    |   |                |    |   |                |    |   |                |    |   |                |    |    |                |   |    |                |   |    |                |   |    |                |   |    |                 |   |   |  |  |                                                                                                                                                                                                                                                                                                                                                                                                                                                                                                                                                                                                                                                                                                     |         |  |         |   |                |   |   |                |   |   |                |   |   |                |   |   |                |   |   |                |   |   |                |   |   |                |   |   |                |   |   |                 |   |   |  |  |                                                                                                                                                                                                                                                                                                                                                                                                                                                                                                                                                                                                                                                                                                     |         |  |         |   |                |   |   |                |   |   |                |   |   |                |   |   |                |   |   |                |   |   |                |   |   |                |   |   |                |   |   |                 |   |   |  |  |                                                                                                                                                                                                                                                                                                                                                                                                                                                                                                                                                                                                                                                                                                     |         |  |         |   |                |   |   |                |   |   |                |   |   |                |   |   |                |   |   |                |   |   |                |   |   |                |   |   |                |   |   |                 |   |   |  |  |
| Trait 1                             |                                                                                                                                                                                                                                                                                                                                                                                                                                                                                                                                                                                                                                                                                                               | Trait 2                                                                           |                                                                                    |                                                                                     |   |                |    |   |                |    |   |                |    |   |                |    |   |                |    |    |                |   |    |                |   |    |                |   |    |                |   |    |                 |   |   |  |  |                                                                                                                                                                                                                                                                                                                                                                                                                                                                                                                                                                                                                                                                                                     |         |  |         |   |                |   |   |                |   |   |                |   |   |                |   |   |                |   |   |                |   |   |                |   |   |                |   |   |                |   |   |                 |   |   |  |  |                                                                                                                                                                                                                                                                                                                                                                                                                                                                                                                                                                                                                                                                                                     |         |  |         |   |                |   |   |                |   |   |                |   |   |                |   |   |                |   |   |                |   |   |                |   |   |                |   |   |                |   |   |                 |   |   |  |  |                                                                                                                                                                                                                                                                                                                                                                                                                                                                                                                                                                                                                                                                                                     |         |  |         |   |                |   |   |                |   |   |                |   |   |                |   |   |                |   |   |                |   |   |                |   |   |                |   |   |                |   |   |                 |   |   |  |  |
| +                                   | V <sub>1</sub>                                                                                                                                                                                                                                                                                                                                                                                                                                                                                                                                                                                                                                                                                                | +                                                                                 |                                                                                    |                                                                                     |   |                |    |   |                |    |   |                |    |   |                |    |   |                |    |    |                |   |    |                |   |    |                |   |    |                |   |    |                 |   |   |  |  |                                                                                                                                                                                                                                                                                                                                                                                                                                                                                                                                                                                                                                                                                                     |         |  |         |   |                |   |   |                |   |   |                |   |   |                |   |   |                |   |   |                |   |   |                |   |   |                |   |   |                |   |   |                 |   |   |  |  |                                                                                                                                                                                                                                                                                                                                                                                                                                                                                                                                                                                                                                                                                                     |         |  |         |   |                |   |   |                |   |   |                |   |   |                |   |   |                |   |   |                |   |   |                |   |   |                |   |   |                |   |   |                 |   |   |  |  |                                                                                                                                                                                                                                                                                                                                                                                                                                                                                                                                                                                                                                                                                                     |         |  |         |   |                |   |   |                |   |   |                |   |   |                |   |   |                |   |   |                |   |   |                |   |   |                |   |   |                |   |   |                 |   |   |  |  |
| +                                   | V <sub>2</sub>                                                                                                                                                                                                                                                                                                                                                                                                                                                                                                                                                                                                                                                                                                | +                                                                                 |                                                                                    |                                                                                     |   |                |    |   |                |    |   |                |    |   |                |    |   |                |    |    |                |   |    |                |   |    |                |   |    |                |   |    |                 |   |   |  |  |                                                                                                                                                                                                                                                                                                                                                                                                                                                                                                                                                                                                                                                                                                     |         |  |         |   |                |   |   |                |   |   |                |   |   |                |   |   |                |   |   |                |   |   |                |   |   |                |   |   |                |   |   |                 |   |   |  |  |                                                                                                                                                                                                                                                                                                                                                                                                                                                                                                                                                                                                                                                                                                     |         |  |         |   |                |   |   |                |   |   |                |   |   |                |   |   |                |   |   |                |   |   |                |   |   |                |   |   |                |   |   |                 |   |   |  |  |                                                                                                                                                                                                                                                                                                                                                                                                                                                                                                                                                                                                                                                                                                     |         |  |         |   |                |   |   |                |   |   |                |   |   |                |   |   |                |   |   |                |   |   |                |   |   |                |   |   |                |   |   |                 |   |   |  |  |
| +                                   | V <sub>3</sub>                                                                                                                                                                                                                                                                                                                                                                                                                                                                                                                                                                                                                                                                                                | +                                                                                 |                                                                                    |                                                                                     |   |                |    |   |                |    |   |                |    |   |                |    |   |                |    |    |                |   |    |                |   |    |                |   |    |                |   |    |                 |   |   |  |  |                                                                                                                                                                                                                                                                                                                                                                                                                                                                                                                                                                                                                                                                                                     |         |  |         |   |                |   |   |                |   |   |                |   |   |                |   |   |                |   |   |                |   |   |                |   |   |                |   |   |                |   |   |                 |   |   |  |  |                                                                                                                                                                                                                                                                                                                                                                                                                                                                                                                                                                                                                                                                                                     |         |  |         |   |                |   |   |                |   |   |                |   |   |                |   |   |                |   |   |                |   |   |                |   |   |                |   |   |                |   |   |                 |   |   |  |  |                                                                                                                                                                                                                                                                                                                                                                                                                                                                                                                                                                                                                                                                                                     |         |  |         |   |                |   |   |                |   |   |                |   |   |                |   |   |                |   |   |                |   |   |                |   |   |                |   |   |                |   |   |                 |   |   |  |  |
| +                                   | V <sub>4</sub>                                                                                                                                                                                                                                                                                                                                                                                                                                                                                                                                                                                                                                                                                                | -                                                                                 |                                                                                    |                                                                                     |   |                |    |   |                |    |   |                |    |   |                |    |   |                |    |    |                |   |    |                |   |    |                |   |    |                |   |    |                 |   |   |  |  |                                                                                                                                                                                                                                                                                                                                                                                                                                                                                                                                                                                                                                                                                                     |         |  |         |   |                |   |   |                |   |   |                |   |   |                |   |   |                |   |   |                |   |   |                |   |   |                |   |   |                |   |   |                 |   |   |  |  |                                                                                                                                                                                                                                                                                                                                                                                                                                                                                                                                                                                                                                                                                                     |         |  |         |   |                |   |   |                |   |   |                |   |   |                |   |   |                |   |   |                |   |   |                |   |   |                |   |   |                |   |   |                 |   |   |  |  |                                                                                                                                                                                                                                                                                                                                                                                                                                                                                                                                                                                                                                                                                                     |         |  |         |   |                |   |   |                |   |   |                |   |   |                |   |   |                |   |   |                |   |   |                |   |   |                |   |   |                |   |   |                 |   |   |  |  |
| +                                   | V <sub>5</sub>                                                                                                                                                                                                                                                                                                                                                                                                                                                                                                                                                                                                                                                                                                | +                                                                                 |                                                                                    |                                                                                     |   |                |    |   |                |    |   |                |    |   |                |    |   |                |    |    |                |   |    |                |   |    |                |   |    |                |   |    |                 |   |   |  |  |                                                                                                                                                                                                                                                                                                                                                                                                                                                                                                                                                                                                                                                                                                     |         |  |         |   |                |   |   |                |   |   |                |   |   |                |   |   |                |   |   |                |   |   |                |   |   |                |   |   |                |   |   |                 |   |   |  |  |                                                                                                                                                                                                                                                                                                                                                                                                                                                                                                                                                                                                                                                                                                     |         |  |         |   |                |   |   |                |   |   |                |   |   |                |   |   |                |   |   |                |   |   |                |   |   |                |   |   |                |   |   |                 |   |   |  |  |                                                                                                                                                                                                                                                                                                                                                                                                                                                                                                                                                                                                                                                                                                     |         |  |         |   |                |   |   |                |   |   |                |   |   |                |   |   |                |   |   |                |   |   |                |   |   |                |   |   |                |   |   |                 |   |   |  |  |
| +                                   | V <sub>6</sub>                                                                                                                                                                                                                                                                                                                                                                                                                                                                                                                                                                                                                                                                                                | +                                                                                 |                                                                                    |                                                                                     |   |                |    |   |                |    |   |                |    |   |                |    |   |                |    |    |                |   |    |                |   |    |                |   |    |                |   |    |                 |   |   |  |  |                                                                                                                                                                                                                                                                                                                                                                                                                                                                                                                                                                                                                                                                                                     |         |  |         |   |                |   |   |                |   |   |                |   |   |                |   |   |                |   |   |                |   |   |                |   |   |                |   |   |                |   |   |                 |   |   |  |  |                                                                                                                                                                                                                                                                                                                                                                                                                                                                                                                                                                                                                                                                                                     |         |  |         |   |                |   |   |                |   |   |                |   |   |                |   |   |                |   |   |                |   |   |                |   |   |                |   |   |                |   |   |                 |   |   |  |  |                                                                                                                                                                                                                                                                                                                                                                                                                                                                                                                                                                                                                                                                                                     |         |  |         |   |                |   |   |                |   |   |                |   |   |                |   |   |                |   |   |                |   |   |                |   |   |                |   |   |                |   |   |                 |   |   |  |  |
| +                                   | V <sub>7</sub>                                                                                                                                                                                                                                                                                                                                                                                                                                                                                                                                                                                                                                                                                                | +                                                                                 |                                                                                    |                                                                                     |   |                |    |   |                |    |   |                |    |   |                |    |   |                |    |    |                |   |    |                |   |    |                |   |    |                |   |    |                 |   |   |  |  |                                                                                                                                                                                                                                                                                                                                                                                                                                                                                                                                                                                                                                                                                                     |         |  |         |   |                |   |   |                |   |   |                |   |   |                |   |   |                |   |   |                |   |   |                |   |   |                |   |   |                |   |   |                 |   |   |  |  |                                                                                                                                                                                                                                                                                                                                                                                                                                                                                                                                                                                                                                                                                                     |         |  |         |   |                |   |   |                |   |   |                |   |   |                |   |   |                |   |   |                |   |   |                |   |   |                |   |   |                |   |   |                 |   |   |  |  |                                                                                                                                                                                                                                                                                                                                                                                                                                                                                                                                                                                                                                                                                                     |         |  |         |   |                |   |   |                |   |   |                |   |   |                |   |   |                |   |   |                |   |   |                |   |   |                |   |   |                |   |   |                 |   |   |  |  |
| +                                   | V <sub>8</sub>                                                                                                                                                                                                                                                                                                                                                                                                                                                                                                                                                                                                                                                                                                | +                                                                                 |                                                                                    |                                                                                     |   |                |    |   |                |    |   |                |    |   |                |    |   |                |    |    |                |   |    |                |   |    |                |   |    |                |   |    |                 |   |   |  |  |                                                                                                                                                                                                                                                                                                                                                                                                                                                                                                                                                                                                                                                                                                     |         |  |         |   |                |   |   |                |   |   |                |   |   |                |   |   |                |   |   |                |   |   |                |   |   |                |   |   |                |   |   |                 |   |   |  |  |                                                                                                                                                                                                                                                                                                                                                                                                                                                                                                                                                                                                                                                                                                     |         |  |         |   |                |   |   |                |   |   |                |   |   |                |   |   |                |   |   |                |   |   |                |   |   |                |   |   |                |   |   |                 |   |   |  |  |                                                                                                                                                                                                                                                                                                                                                                                                                                                                                                                                                                                                                                                                                                     |         |  |         |   |                |   |   |                |   |   |                |   |   |                |   |   |                |   |   |                |   |   |                |   |   |                |   |   |                |   |   |                 |   |   |  |  |
| +                                   | V <sub>9</sub>                                                                                                                                                                                                                                                                                                                                                                                                                                                                                                                                                                                                                                                                                                | -                                                                                 |                                                                                    |                                                                                     |   |                |    |   |                |    |   |                |    |   |                |    |   |                |    |    |                |   |    |                |   |    |                |   |    |                |   |    |                 |   |   |  |  |                                                                                                                                                                                                                                                                                                                                                                                                                                                                                                                                                                                                                                                                                                     |         |  |         |   |                |   |   |                |   |   |                |   |   |                |   |   |                |   |   |                |   |   |                |   |   |                |   |   |                |   |   |                 |   |   |  |  |                                                                                                                                                                                                                                                                                                                                                                                                                                                                                                                                                                                                                                                                                                     |         |  |         |   |                |   |   |                |   |   |                |   |   |                |   |   |                |   |   |                |   |   |                |   |   |                |   |   |                |   |   |                 |   |   |  |  |                                                                                                                                                                                                                                                                                                                                                                                                                                                                                                                                                                                                                                                                                                     |         |  |         |   |                |   |   |                |   |   |                |   |   |                |   |   |                |   |   |                |   |   |                |   |   |                |   |   |                |   |   |                 |   |   |  |  |
| +                                   | V <sub>10</sub>                                                                                                                                                                                                                                                                                                                                                                                                                                                                                                                                                                                                                                                                                               | +                                                                                 |                                                                                    |                                                                                     |   |                |    |   |                |    |   |                |    |   |                |    |   |                |    |    |                |   |    |                |   |    |                |   |    |                |   |    |                 |   |   |  |  |                                                                                                                                                                                                                                                                                                                                                                                                                                                                                                                                                                                                                                                                                                     |         |  |         |   |                |   |   |                |   |   |                |   |   |                |   |   |                |   |   |                |   |   |                |   |   |                |   |   |                |   |   |                 |   |   |  |  |                                                                                                                                                                                                                                                                                                                                                                                                                                                                                                                                                                                                                                                                                                     |         |  |         |   |                |   |   |                |   |   |                |   |   |                |   |   |                |   |   |                |   |   |                |   |   |                |   |   |                |   |   |                 |   |   |  |  |                                                                                                                                                                                                                                                                                                                                                                                                                                                                                                                                                                                                                                                                                                     |         |  |         |   |                |   |   |                |   |   |                |   |   |                |   |   |                |   |   |                |   |   |                |   |   |                |   |   |                |   |   |                 |   |   |  |  |
| ⋮                                   |                                                                                                                                                                                                                                                                                                                                                                                                                                                                                                                                                                                                                                                                                                               |                                                                                   |                                                                                    |                                                                                     |   |                |    |   |                |    |   |                |    |   |                |    |   |                |    |    |                |   |    |                |   |    |                |   |    |                |   |    |                 |   |   |  |  |                                                                                                                                                                                                                                                                                                                                                                                                                                                                                                                                                                                                                                                                                                     |         |  |         |   |                |   |   |                |   |   |                |   |   |                |   |   |                |   |   |                |   |   |                |   |   |                |   |   |                |   |   |                 |   |   |  |  |                                                                                                                                                                                                                                                                                                                                                                                                                                                                                                                                                                                                                                                                                                     |         |  |         |   |                |   |   |                |   |   |                |   |   |                |   |   |                |   |   |                |   |   |                |   |   |                |   |   |                |   |   |                 |   |   |  |  |                                                                                                                                                                                                                                                                                                                                                                                                                                                                                                                                                                                                                                                                                                     |         |  |         |   |                |   |   |                |   |   |                |   |   |                |   |   |                |   |   |                |   |   |                |   |   |                |   |   |                |   |   |                 |   |   |  |  |
| Trait 1                             |                                                                                                                                                                                                                                                                                                                                                                                                                                                                                                                                                                                                                                                                                                               | Trait 2                                                                           |                                                                                    |                                                                                     |   |                |    |   |                |    |   |                |    |   |                |    |   |                |    |    |                |   |    |                |   |    |                |   |    |                |   |    |                 |   |   |  |  |                                                                                                                                                                                                                                                                                                                                                                                                                                                                                                                                                                                                                                                                                                     |         |  |         |   |                |   |   |                |   |   |                |   |   |                |   |   |                |   |   |                |   |   |                |   |   |                |   |   |                |   |   |                 |   |   |  |  |                                                                                                                                                                                                                                                                                                                                                                                                                                                                                                                                                                                                                                                                                                     |         |  |         |   |                |   |   |                |   |   |                |   |   |                |   |   |                |   |   |                |   |   |                |   |   |                |   |   |                |   |   |                 |   |   |  |  |                                                                                                                                                                                                                                                                                                                                                                                                                                                                                                                                                                                                                                                                                                     |         |  |         |   |                |   |   |                |   |   |                |   |   |                |   |   |                |   |   |                |   |   |                |   |   |                |   |   |                |   |   |                 |   |   |  |  |
| +                                   | V <sub>1</sub>                                                                                                                                                                                                                                                                                                                                                                                                                                                                                                                                                                                                                                                                                                | -                                                                                 |                                                                                    |                                                                                     |   |                |    |   |                |    |   |                |    |   |                |    |   |                |    |    |                |   |    |                |   |    |                |   |    |                |   |    |                 |   |   |  |  |                                                                                                                                                                                                                                                                                                                                                                                                                                                                                                                                                                                                                                                                                                     |         |  |         |   |                |   |   |                |   |   |                |   |   |                |   |   |                |   |   |                |   |   |                |   |   |                |   |   |                |   |   |                 |   |   |  |  |                                                                                                                                                                                                                                                                                                                                                                                                                                                                                                                                                                                                                                                                                                     |         |  |         |   |                |   |   |                |   |   |                |   |   |                |   |   |                |   |   |                |   |   |                |   |   |                |   |   |                |   |   |                 |   |   |  |  |                                                                                                                                                                                                                                                                                                                                                                                                                                                                                                                                                                                                                                                                                                     |         |  |         |   |                |   |   |                |   |   |                |   |   |                |   |   |                |   |   |                |   |   |                |   |   |                |   |   |                |   |   |                 |   |   |  |  |
| +                                   | V <sub>2</sub>                                                                                                                                                                                                                                                                                                                                                                                                                                                                                                                                                                                                                                                                                                | -                                                                                 |                                                                                    |                                                                                     |   |                |    |   |                |    |   |                |    |   |                |    |   |                |    |    |                |   |    |                |   |    |                |   |    |                |   |    |                 |   |   |  |  |                                                                                                                                                                                                                                                                                                                                                                                                                                                                                                                                                                                                                                                                                                     |         |  |         |   |                |   |   |                |   |   |                |   |   |                |   |   |                |   |   |                |   |   |                |   |   |                |   |   |                |   |   |                 |   |   |  |  |                                                                                                                                                                                                                                                                                                                                                                                                                                                                                                                                                                                                                                                                                                     |         |  |         |   |                |   |   |                |   |   |                |   |   |                |   |   |                |   |   |                |   |   |                |   |   |                |   |   |                |   |   |                 |   |   |  |  |                                                                                                                                                                                                                                                                                                                                                                                                                                                                                                                                                                                                                                                                                                     |         |  |         |   |                |   |   |                |   |   |                |   |   |                |   |   |                |   |   |                |   |   |                |   |   |                |   |   |                |   |   |                 |   |   |  |  |
| +                                   | V <sub>3</sub>                                                                                                                                                                                                                                                                                                                                                                                                                                                                                                                                                                                                                                                                                                | +                                                                                 |                                                                                    |                                                                                     |   |                |    |   |                |    |   |                |    |   |                |    |   |                |    |    |                |   |    |                |   |    |                |   |    |                |   |    |                 |   |   |  |  |                                                                                                                                                                                                                                                                                                                                                                                                                                                                                                                                                                                                                                                                                                     |         |  |         |   |                |   |   |                |   |   |                |   |   |                |   |   |                |   |   |                |   |   |                |   |   |                |   |   |                |   |   |                 |   |   |  |  |                                                                                                                                                                                                                                                                                                                                                                                                                                                                                                                                                                                                                                                                                                     |         |  |         |   |                |   |   |                |   |   |                |   |   |                |   |   |                |   |   |                |   |   |                |   |   |                |   |   |                |   |   |                 |   |   |  |  |                                                                                                                                                                                                                                                                                                                                                                                                                                                                                                                                                                                                                                                                                                     |         |  |         |   |                |   |   |                |   |   |                |   |   |                |   |   |                |   |   |                |   |   |                |   |   |                |   |   |                |   |   |                 |   |   |  |  |
| +                                   | V <sub>4</sub>                                                                                                                                                                                                                                                                                                                                                                                                                                                                                                                                                                                                                                                                                                | -                                                                                 |                                                                                    |                                                                                     |   |                |    |   |                |    |   |                |    |   |                |    |   |                |    |    |                |   |    |                |   |    |                |   |    |                |   |    |                 |   |   |  |  |                                                                                                                                                                                                                                                                                                                                                                                                                                                                                                                                                                                                                                                                                                     |         |  |         |   |                |   |   |                |   |   |                |   |   |                |   |   |                |   |   |                |   |   |                |   |   |                |   |   |                |   |   |                 |   |   |  |  |                                                                                                                                                                                                                                                                                                                                                                                                                                                                                                                                                                                                                                                                                                     |         |  |         |   |                |   |   |                |   |   |                |   |   |                |   |   |                |   |   |                |   |   |                |   |   |                |   |   |                |   |   |                 |   |   |  |  |                                                                                                                                                                                                                                                                                                                                                                                                                                                                                                                                                                                                                                                                                                     |         |  |         |   |                |   |   |                |   |   |                |   |   |                |   |   |                |   |   |                |   |   |                |   |   |                |   |   |                |   |   |                 |   |   |  |  |
| +                                   | V <sub>5</sub>                                                                                                                                                                                                                                                                                                                                                                                                                                                                                                                                                                                                                                                                                                | -                                                                                 |                                                                                    |                                                                                     |   |                |    |   |                |    |   |                |    |   |                |    |   |                |    |    |                |   |    |                |   |    |                |   |    |                |   |    |                 |   |   |  |  |                                                                                                                                                                                                                                                                                                                                                                                                                                                                                                                                                                                                                                                                                                     |         |  |         |   |                |   |   |                |   |   |                |   |   |                |   |   |                |   |   |                |   |   |                |   |   |                |   |   |                |   |   |                 |   |   |  |  |                                                                                                                                                                                                                                                                                                                                                                                                                                                                                                                                                                                                                                                                                                     |         |  |         |   |                |   |   |                |   |   |                |   |   |                |   |   |                |   |   |                |   |   |                |   |   |                |   |   |                |   |   |                 |   |   |  |  |                                                                                                                                                                                                                                                                                                                                                                                                                                                                                                                                                                                                                                                                                                     |         |  |         |   |                |   |   |                |   |   |                |   |   |                |   |   |                |   |   |                |   |   |                |   |   |                |   |   |                |   |   |                 |   |   |  |  |
| +                                   | V <sub>6</sub>                                                                                                                                                                                                                                                                                                                                                                                                                                                                                                                                                                                                                                                                                                | -                                                                                 |                                                                                    |                                                                                     |   |                |    |   |                |    |   |                |    |   |                |    |   |                |    |    |                |   |    |                |   |    |                |   |    |                |   |    |                 |   |   |  |  |                                                                                                                                                                                                                                                                                                                                                                                                                                                                                                                                                                                                                                                                                                     |         |  |         |   |                |   |   |                |   |   |                |   |   |                |   |   |                |   |   |                |   |   |                |   |   |                |   |   |                |   |   |                 |   |   |  |  |                                                                                                                                                                                                                                                                                                                                                                                                                                                                                                                                                                                                                                                                                                     |         |  |         |   |                |   |   |                |   |   |                |   |   |                |   |   |                |   |   |                |   |   |                |   |   |                |   |   |                |   |   |                 |   |   |  |  |                                                                                                                                                                                                                                                                                                                                                                                                                                                                                                                                                                                                                                                                                                     |         |  |         |   |                |   |   |                |   |   |                |   |   |                |   |   |                |   |   |                |   |   |                |   |   |                |   |   |                |   |   |                 |   |   |  |  |
| +                                   | V <sub>7</sub>                                                                                                                                                                                                                                                                                                                                                                                                                                                                                                                                                                                                                                                                                                | -                                                                                 |                                                                                    |                                                                                     |   |                |    |   |                |    |   |                |    |   |                |    |   |                |    |    |                |   |    |                |   |    |                |   |    |                |   |    |                 |   |   |  |  |                                                                                                                                                                                                                                                                                                                                                                                                                                                                                                                                                                                                                                                                                                     |         |  |         |   |                |   |   |                |   |   |                |   |   |                |   |   |                |   |   |                |   |   |                |   |   |                |   |   |                |   |   |                 |   |   |  |  |                                                                                                                                                                                                                                                                                                                                                                                                                                                                                                                                                                                                                                                                                                     |         |  |         |   |                |   |   |                |   |   |                |   |   |                |   |   |                |   |   |                |   |   |                |   |   |                |   |   |                |   |   |                 |   |   |  |  |                                                                                                                                                                                                                                                                                                                                                                                                                                                                                                                                                                                                                                                                                                     |         |  |         |   |                |   |   |                |   |   |                |   |   |                |   |   |                |   |   |                |   |   |                |   |   |                |   |   |                |   |   |                 |   |   |  |  |
| +                                   | V <sub>8</sub>                                                                                                                                                                                                                                                                                                                                                                                                                                                                                                                                                                                                                                                                                                | -                                                                                 |                                                                                    |                                                                                     |   |                |    |   |                |    |   |                |    |   |                |    |   |                |    |    |                |   |    |                |   |    |                |   |    |                |   |    |                 |   |   |  |  |                                                                                                                                                                                                                                                                                                                                                                                                                                                                                                                                                                                                                                                                                                     |         |  |         |   |                |   |   |                |   |   |                |   |   |                |   |   |                |   |   |                |   |   |                |   |   |                |   |   |                |   |   |                 |   |   |  |  |                                                                                                                                                                                                                                                                                                                                                                                                                                                                                                                                                                                                                                                                                                     |         |  |         |   |                |   |   |                |   |   |                |   |   |                |   |   |                |   |   |                |   |   |                |   |   |                |   |   |                |   |   |                 |   |   |  |  |                                                                                                                                                                                                                                                                                                                                                                                                                                                                                                                                                                                                                                                                                                     |         |  |         |   |                |   |   |                |   |   |                |   |   |                |   |   |                |   |   |                |   |   |                |   |   |                |   |   |                |   |   |                 |   |   |  |  |
| +                                   | V <sub>9</sub>                                                                                                                                                                                                                                                                                                                                                                                                                                                                                                                                                                                                                                                                                                | -                                                                                 |                                                                                    |                                                                                     |   |                |    |   |                |    |   |                |    |   |                |    |   |                |    |    |                |   |    |                |   |    |                |   |    |                |   |    |                 |   |   |  |  |                                                                                                                                                                                                                                                                                                                                                                                                                                                                                                                                                                                                                                                                                                     |         |  |         |   |                |   |   |                |   |   |                |   |   |                |   |   |                |   |   |                |   |   |                |   |   |                |   |   |                |   |   |                 |   |   |  |  |                                                                                                                                                                                                                                                                                                                                                                                                                                                                                                                                                                                                                                                                                                     |         |  |         |   |                |   |   |                |   |   |                |   |   |                |   |   |                |   |   |                |   |   |                |   |   |                |   |   |                |   |   |                 |   |   |  |  |                                                                                                                                                                                                                                                                                                                                                                                                                                                                                                                                                                                                                                                                                                     |         |  |         |   |                |   |   |                |   |   |                |   |   |                |   |   |                |   |   |                |   |   |                |   |   |                |   |   |                |   |   |                 |   |   |  |  |
| +                                   | V <sub>10</sub>                                                                                                                                                                                                                                                                                                                                                                                                                                                                                                                                                                                                                                                                                               | +                                                                                 |                                                                                    |                                                                                     |   |                |    |   |                |    |   |                |    |   |                |    |   |                |    |    |                |   |    |                |   |    |                |   |    |                |   |    |                 |   |   |  |  |                                                                                                                                                                                                                                                                                                                                                                                                                                                                                                                                                                                                                                                                                                     |         |  |         |   |                |   |   |                |   |   |                |   |   |                |   |   |                |   |   |                |   |   |                |   |   |                |   |   |                |   |   |                 |   |   |  |  |                                                                                                                                                                                                                                                                                                                                                                                                                                                                                                                                                                                                                                                                                                     |         |  |         |   |                |   |   |                |   |   |                |   |   |                |   |   |                |   |   |                |   |   |                |   |   |                |   |   |                |   |   |                 |   |   |  |  |                                                                                                                                                                                                                                                                                                                                                                                                                                                                                                                                                                                                                                                                                                     |         |  |         |   |                |   |   |                |   |   |                |   |   |                |   |   |                |   |   |                |   |   |                |   |   |                |   |   |                |   |   |                 |   |   |  |  |
| ⋮                                   |                                                                                                                                                                                                                                                                                                                                                                                                                                                                                                                                                                                                                                                                                                               |                                                                                   |                                                                                    |                                                                                     |   |                |    |   |                |    |   |                |    |   |                |    |   |                |    |    |                |   |    |                |   |    |                |   |    |                |   |    |                 |   |   |  |  |                                                                                                                                                                                                                                                                                                                                                                                                                                                                                                                                                                                                                                                                                                     |         |  |         |   |                |   |   |                |   |   |                |   |   |                |   |   |                |   |   |                |   |   |                |   |   |                |   |   |                |   |   |                 |   |   |  |  |                                                                                                                                                                                                                                                                                                                                                                                                                                                                                                                                                                                                                                                                                                     |         |  |         |   |                |   |   |                |   |   |                |   |   |                |   |   |                |   |   |                |   |   |                |   |   |                |   |   |                |   |   |                 |   |   |  |  |                                                                                                                                                                                                                                                                                                                                                                                                                                                                                                                                                                                                                                                                                                     |         |  |         |   |                |   |   |                |   |   |                |   |   |                |   |   |                |   |   |                |   |   |                |   |   |                |   |   |                |   |   |                 |   |   |  |  |
| Trait 1                             |                                                                                                                                                                                                                                                                                                                                                                                                                                                                                                                                                                                                                                                                                                               | Trait 2                                                                           |                                                                                    |                                                                                     |   |                |    |   |                |    |   |                |    |   |                |    |   |                |    |    |                |   |    |                |   |    |                |   |    |                |   |    |                 |   |   |  |  |                                                                                                                                                                                                                                                                                                                                                                                                                                                                                                                                                                                                                                                                                                     |         |  |         |   |                |   |   |                |   |   |                |   |   |                |   |   |                |   |   |                |   |   |                |   |   |                |   |   |                |   |   |                 |   |   |  |  |                                                                                                                                                                                                                                                                                                                                                                                                                                                                                                                                                                                                                                                                                                     |         |  |         |   |                |   |   |                |   |   |                |   |   |                |   |   |                |   |   |                |   |   |                |   |   |                |   |   |                |   |   |                 |   |   |  |  |                                                                                                                                                                                                                                                                                                                                                                                                                                                                                                                                                                                                                                                                                                     |         |  |         |   |                |   |   |                |   |   |                |   |   |                |   |   |                |   |   |                |   |   |                |   |   |                |   |   |                |   |   |                 |   |   |  |  |
| +                                   | V <sub>1</sub>                                                                                                                                                                                                                                                                                                                                                                                                                                                                                                                                                                                                                                                                                                | -                                                                                 |                                                                                    |                                                                                     |   |                |    |   |                |    |   |                |    |   |                |    |   |                |    |    |                |   |    |                |   |    |                |   |    |                |   |    |                 |   |   |  |  |                                                                                                                                                                                                                                                                                                                                                                                                                                                                                                                                                                                                                                                                                                     |         |  |         |   |                |   |   |                |   |   |                |   |   |                |   |   |                |   |   |                |   |   |                |   |   |                |   |   |                |   |   |                 |   |   |  |  |                                                                                                                                                                                                                                                                                                                                                                                                                                                                                                                                                                                                                                                                                                     |         |  |         |   |                |   |   |                |   |   |                |   |   |                |   |   |                |   |   |                |   |   |                |   |   |                |   |   |                |   |   |                 |   |   |  |  |                                                                                                                                                                                                                                                                                                                                                                                                                                                                                                                                                                                                                                                                                                     |         |  |         |   |                |   |   |                |   |   |                |   |   |                |   |   |                |   |   |                |   |   |                |   |   |                |   |   |                |   |   |                 |   |   |  |  |
| +                                   | V <sub>2</sub>                                                                                                                                                                                                                                                                                                                                                                                                                                                                                                                                                                                                                                                                                                | -                                                                                 |                                                                                    |                                                                                     |   |                |    |   |                |    |   |                |    |   |                |    |   |                |    |    |                |   |    |                |   |    |                |   |    |                |   |    |                 |   |   |  |  |                                                                                                                                                                                                                                                                                                                                                                                                                                                                                                                                                                                                                                                                                                     |         |  |         |   |                |   |   |                |   |   |                |   |   |                |   |   |                |   |   |                |   |   |                |   |   |                |   |   |                |   |   |                 |   |   |  |  |                                                                                                                                                                                                                                                                                                                                                                                                                                                                                                                                                                                                                                                                                                     |         |  |         |   |                |   |   |                |   |   |                |   |   |                |   |   |                |   |   |                |   |   |                |   |   |                |   |   |                |   |   |                 |   |   |  |  |                                                                                                                                                                                                                                                                                                                                                                                                                                                                                                                                                                                                                                                                                                     |         |  |         |   |                |   |   |                |   |   |                |   |   |                |   |   |                |   |   |                |   |   |                |   |   |                |   |   |                |   |   |                 |   |   |  |  |
| +                                   | V <sub>3</sub>                                                                                                                                                                                                                                                                                                                                                                                                                                                                                                                                                                                                                                                                                                | -                                                                                 |                                                                                    |                                                                                     |   |                |    |   |                |    |   |                |    |   |                |    |   |                |    |    |                |   |    |                |   |    |                |   |    |                |   |    |                 |   |   |  |  |                                                                                                                                                                                                                                                                                                                                                                                                                                                                                                                                                                                                                                                                                                     |         |  |         |   |                |   |   |                |   |   |                |   |   |                |   |   |                |   |   |                |   |   |                |   |   |                |   |   |                |   |   |                 |   |   |  |  |                                                                                                                                                                                                                                                                                                                                                                                                                                                                                                                                                                                                                                                                                                     |         |  |         |   |                |   |   |                |   |   |                |   |   |                |   |   |                |   |   |                |   |   |                |   |   |                |   |   |                |   |   |                 |   |   |  |  |                                                                                                                                                                                                                                                                                                                                                                                                                                                                                                                                                                                                                                                                                                     |         |  |         |   |                |   |   |                |   |   |                |   |   |                |   |   |                |   |   |                |   |   |                |   |   |                |   |   |                |   |   |                 |   |   |  |  |
| +                                   | V <sub>4</sub>                                                                                                                                                                                                                                                                                                                                                                                                                                                                                                                                                                                                                                                                                                | -                                                                                 |                                                                                    |                                                                                     |   |                |    |   |                |    |   |                |    |   |                |    |   |                |    |    |                |   |    |                |   |    |                |   |    |                |   |    |                 |   |   |  |  |                                                                                                                                                                                                                                                                                                                                                                                                                                                                                                                                                                                                                                                                                                     |         |  |         |   |                |   |   |                |   |   |                |   |   |                |   |   |                |   |   |                |   |   |                |   |   |                |   |   |                |   |   |                 |   |   |  |  |                                                                                                                                                                                                                                                                                                                                                                                                                                                                                                                                                                                                                                                                                                     |         |  |         |   |                |   |   |                |   |   |                |   |   |                |   |   |                |   |   |                |   |   |                |   |   |                |   |   |                |   |   |                 |   |   |  |  |                                                                                                                                                                                                                                                                                                                                                                                                                                                                                                                                                                                                                                                                                                     |         |  |         |   |                |   |   |                |   |   |                |   |   |                |   |   |                |   |   |                |   |   |                |   |   |                |   |   |                |   |   |                 |   |   |  |  |
| +                                   | V <sub>5</sub>                                                                                                                                                                                                                                                                                                                                                                                                                                                                                                                                                                                                                                                                                                | -                                                                                 |                                                                                    |                                                                                     |   |                |    |   |                |    |   |                |    |   |                |    |   |                |    |    |                |   |    |                |   |    |                |   |    |                |   |    |                 |   |   |  |  |                                                                                                                                                                                                                                                                                                                                                                                                                                                                                                                                                                                                                                                                                                     |         |  |         |   |                |   |   |                |   |   |                |   |   |                |   |   |                |   |   |                |   |   |                |   |   |                |   |   |                |   |   |                 |   |   |  |  |                                                                                                                                                                                                                                                                                                                                                                                                                                                                                                                                                                                                                                                                                                     |         |  |         |   |                |   |   |                |   |   |                |   |   |                |   |   |                |   |   |                |   |   |                |   |   |                |   |   |                |   |   |                 |   |   |  |  |                                                                                                                                                                                                                                                                                                                                                                                                                                                                                                                                                                                                                                                                                                     |         |  |         |   |                |   |   |                |   |   |                |   |   |                |   |   |                |   |   |                |   |   |                |   |   |                |   |   |                |   |   |                 |   |   |  |  |
| +                                   | V <sub>6</sub>                                                                                                                                                                                                                                                                                                                                                                                                                                                                                                                                                                                                                                                                                                | +                                                                                 |                                                                                    |                                                                                     |   |                |    |   |                |    |   |                |    |   |                |    |   |                |    |    |                |   |    |                |   |    |                |   |    |                |   |    |                 |   |   |  |  |                                                                                                                                                                                                                                                                                                                                                                                                                                                                                                                                                                                                                                                                                                     |         |  |         |   |                |   |   |                |   |   |                |   |   |                |   |   |                |   |   |                |   |   |                |   |   |                |   |   |                |   |   |                 |   |   |  |  |                                                                                                                                                                                                                                                                                                                                                                                                                                                                                                                                                                                                                                                                                                     |         |  |         |   |                |   |   |                |   |   |                |   |   |                |   |   |                |   |   |                |   |   |                |   |   |                |   |   |                |   |   |                 |   |   |  |  |                                                                                                                                                                                                                                                                                                                                                                                                                                                                                                                                                                                                                                                                                                     |         |  |         |   |                |   |   |                |   |   |                |   |   |                |   |   |                |   |   |                |   |   |                |   |   |                |   |   |                |   |   |                 |   |   |  |  |
| +                                   | V <sub>7</sub>                                                                                                                                                                                                                                                                                                                                                                                                                                                                                                                                                                                                                                                                                                | +                                                                                 |                                                                                    |                                                                                     |   |                |    |   |                |    |   |                |    |   |                |    |   |                |    |    |                |   |    |                |   |    |                |   |    |                |   |    |                 |   |   |  |  |                                                                                                                                                                                                                                                                                                                                                                                                                                                                                                                                                                                                                                                                                                     |         |  |         |   |                |   |   |                |   |   |                |   |   |                |   |   |                |   |   |                |   |   |                |   |   |                |   |   |                |   |   |                 |   |   |  |  |                                                                                                                                                                                                                                                                                                                                                                                                                                                                                                                                                                                                                                                                                                     |         |  |         |   |                |   |   |                |   |   |                |   |   |                |   |   |                |   |   |                |   |   |                |   |   |                |   |   |                |   |   |                 |   |   |  |  |                                                                                                                                                                                                                                                                                                                                                                                                                                                                                                                                                                                                                                                                                                     |         |  |         |   |                |   |   |                |   |   |                |   |   |                |   |   |                |   |   |                |   |   |                |   |   |                |   |   |                |   |   |                 |   |   |  |  |
| +                                   | V <sub>8</sub>                                                                                                                                                                                                                                                                                                                                                                                                                                                                                                                                                                                                                                                                                                | +                                                                                 |                                                                                    |                                                                                     |   |                |    |   |                |    |   |                |    |   |                |    |   |                |    |    |                |   |    |                |   |    |                |   |    |                |   |    |                 |   |   |  |  |                                                                                                                                                                                                                                                                                                                                                                                                                                                                                                                                                                                                                                                                                                     |         |  |         |   |                |   |   |                |   |   |                |   |   |                |   |   |                |   |   |                |   |   |                |   |   |                |   |   |                |   |   |                 |   |   |  |  |                                                                                                                                                                                                                                                                                                                                                                                                                                                                                                                                                                                                                                                                                                     |         |  |         |   |                |   |   |                |   |   |                |   |   |                |   |   |                |   |   |                |   |   |                |   |   |                |   |   |                |   |   |                 |   |   |  |  |                                                                                                                                                                                                                                                                                                                                                                                                                                                                                                                                                                                                                                                                                                     |         |  |         |   |                |   |   |                |   |   |                |   |   |                |   |   |                |   |   |                |   |   |                |   |   |                |   |   |                |   |   |                 |   |   |  |  |
| +                                   | V <sub>9</sub>                                                                                                                                                                                                                                                                                                                                                                                                                                                                                                                                                                                                                                                                                                | +                                                                                 |                                                                                    |                                                                                     |   |                |    |   |                |    |   |                |    |   |                |    |   |                |    |    |                |   |    |                |   |    |                |   |    |                |   |    |                 |   |   |  |  |                                                                                                                                                                                                                                                                                                                                                                                                                                                                                                                                                                                                                                                                                                     |         |  |         |   |                |   |   |                |   |   |                |   |   |                |   |   |                |   |   |                |   |   |                |   |   |                |   |   |                |   |   |                 |   |   |  |  |                                                                                                                                                                                                                                                                                                                                                                                                                                                                                                                                                                                                                                                                                                     |         |  |         |   |                |   |   |                |   |   |                |   |   |                |   |   |                |   |   |                |   |   |                |   |   |                |   |   |                |   |   |                 |   |   |  |  |                                                                                                                                                                                                                                                                                                                                                                                                                                                                                                                                                                                                                                                                                                     |         |  |         |   |                |   |   |                |   |   |                |   |   |                |   |   |                |   |   |                |   |   |                |   |   |                |   |   |                |   |   |                 |   |   |  |  |
| +                                   | V <sub>10</sub>                                                                                                                                                                                                                                                                                                                                                                                                                                                                                                                                                                                                                                                                                               | +                                                                                 |                                                                                    |                                                                                     |   |                |    |   |                |    |   |                |    |   |                |    |   |                |    |    |                |   |    |                |   |    |                |   |    |                |   |    |                 |   |   |  |  |                                                                                                                                                                                                                                                                                                                                                                                                                                                                                                                                                                                                                                                                                                     |         |  |         |   |                |   |   |                |   |   |                |   |   |                |   |   |                |   |   |                |   |   |                |   |   |                |   |   |                |   |   |                 |   |   |  |  |                                                                                                                                                                                                                                                                                                                                                                                                                                                                                                                                                                                                                                                                                                     |         |  |         |   |                |   |   |                |   |   |                |   |   |                |   |   |                |   |   |                |   |   |                |   |   |                |   |   |                |   |   |                 |   |   |  |  |                                                                                                                                                                                                                                                                                                                                                                                                                                                                                                                                                                                                                                                                                                     |         |  |         |   |                |   |   |                |   |   |                |   |   |                |   |   |                |   |   |                |   |   |                |   |   |                |   |   |                |   |   |                 |   |   |  |  |
| ⋮                                   |                                                                                                                                                                                                                                                                                                                                                                                                                                                                                                                                                                                                                                                                                                               |                                                                                   |                                                                                    |                                                                                     |   |                |    |   |                |    |   |                |    |   |                |    |   |                |    |    |                |   |    |                |   |    |                |   |    |                |   |    |                 |   |   |  |  |                                                                                                                                                                                                                                                                                                                                                                                                                                                                                                                                                                                                                                                                                                     |         |  |         |   |                |   |   |                |   |   |                |   |   |                |   |   |                |   |   |                |   |   |                |   |   |                |   |   |                |   |   |                 |   |   |  |  |                                                                                                                                                                                                                                                                                                                                                                                                                                                                                                                                                                                                                                                                                                     |         |  |         |   |                |   |   |                |   |   |                |   |   |                |   |   |                |   |   |                |   |   |                |   |   |                |   |   |                |   |   |                 |   |   |  |  |                                                                                                                                                                                                                                                                                                                                                                                                                                                                                                                                                                                                                                                                                                     |         |  |         |   |                |   |   |                |   |   |                |   |   |                |   |   |                |   |   |                |   |   |                |   |   |                |   |   |                |   |   |                 |   |   |  |  |
|                                     | 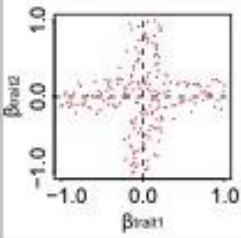                                                                                                                                                                                                                                                                                                                                                                                                                                                                                                                                                                                                                             |  |  |  |   |                |    |   |                |    |   |                |    |   |                |    |   |                |    |    |                |   |    |                |   |    |                |   |    |                |   |    |                 |   |   |  |  |                                                                                                                                                                                                                                                                                                                                                                                                                                                                                                                                                                                                                                                                                                     |         |  |         |   |                |   |   |                |   |   |                |   |   |                |   |   |                |   |   |                |   |   |                |   |   |                |   |   |                |   |   |                 |   |   |  |  |                                                                                                                                                                                                                                                                                                                                                                                                                                                                                                                                                                                                                                                                                                     |         |  |         |   |                |   |   |                |   |   |                |   |   |                |   |   |                |   |   |                |   |   |                |   |   |                |   |   |                |   |   |                 |   |   |  |  |                                                                                                                                                                                                                                                                                                                                                                                                                                                                                                                                                                                                                                                                                                     |         |  |         |   |                |   |   |                |   |   |                |   |   |                |   |   |                |   |   |                |   |   |                |   |   |                |   |   |                |   |   |                 |   |   |  |  |
| Polygeninic overlap                 | No                                                                                                                                                                                                                                                                                                                                                                                                                                                                                                                                                                                                                                                                                                            | Yes                                                                               | Yes                                                                                | Yes                                                                                 |   |                |    |   |                |    |   |                |    |   |                |    |   |                |    |    |                |   |    |                |   |    |                |   |    |                |   |    |                 |   |   |  |  |                                                                                                                                                                                                                                                                                                                                                                                                                                                                                                                                                                                                                                                                                                     |         |  |         |   |                |   |   |                |   |   |                |   |   |                |   |   |                |   |   |                |   |   |                |   |   |                |   |   |                |   |   |                 |   |   |  |  |                                                                                                                                                                                                                                                                                                                                                                                                                                                                                                                                                                                                                                                                                                     |         |  |         |   |                |   |   |                |   |   |                |   |   |                |   |   |                |   |   |                |   |   |                |   |   |                |   |   |                |   |   |                 |   |   |  |  |                                                                                                                                                                                                                                                                                                                                                                                                                                                                                                                                                                                                                                                                                                     |         |  |         |   |                |   |   |                |   |   |                |   |   |                |   |   |                |   |   |                |   |   |                |   |   |                |   |   |                |   |   |                 |   |   |  |  |
| Effect directions on the two traits | Not applicable                                                                                                                                                                                                                                                                                                                                                                                                                                                                                                                                                                                                                                                                                                | Predominantly concordant                                                          | Predominantly discordant                                                           | A balance of concordant and discordant                                              |   |                |    |   |                |    |   |                |    |   |                |    |   |                |    |    |                |   |    |                |   |    |                |   |    |                |   |    |                 |   |   |  |  |                                                                                                                                                                                                                                                                                                                                                                                                                                                                                                                                                                                                                                                                                                     |         |  |         |   |                |   |   |                |   |   |                |   |   |                |   |   |                |   |   |                |   |   |                |   |   |                |   |   |                |   |   |                 |   |   |  |  |                                                                                                                                                                                                                                                                                                                                                                                                                                                                                                                                                                                                                                                                                                     |         |  |         |   |                |   |   |                |   |   |                |   |   |                |   |   |                |   |   |                |   |   |                |   |   |                |   |   |                |   |   |                 |   |   |  |  |                                                                                                                                                                                                                                                                                                                                                                                                                                                                                                                                                                                                                                                                                                     |         |  |         |   |                |   |   |                |   |   |                |   |   |                |   |   |                |   |   |                |   |   |                |   |   |                |   |   |                |   |   |                 |   |   |  |  |
| Genetic correlation                 | No ( $r_g = 0$ )                                                                                                                                                                                                                                                                                                                                                                                                                                                                                                                                                                                                                                                                                              | Positive ( $r_g > 0$ )                                                            | Negative ( $r_g < 0$ )                                                             | Minimal ( $r_g \approx 0$ )                                                         |   |                |    |   |                |    |   |                |    |   |                |    |   |                |    |    |                |   |    |                |   |    |                |   |    |                |   |    |                 |   |   |  |  |                                                                                                                                                                                                                                                                                                                                                                                                                                                                                                                                                                                                                                                                                                     |         |  |         |   |                |   |   |                |   |   |                |   |   |                |   |   |                |   |   |                |   |   |                |   |   |                |   |   |                |   |   |                 |   |   |  |  |                                                                                                                                                                                                                                                                                                                                                                                                                                                                                                                                                                                                                                                                                                     |         |  |         |   |                |   |   |                |   |   |                |   |   |                |   |   |                |   |   |                |   |   |                |   |   |                |   |   |                |   |   |                 |   |   |  |  |                                                                                                                                                                                                                                                                                                                                                                                                                                                                                                                                                                                                                                                                                                     |         |  |         |   |                |   |   |                |   |   |                |   |   |                |   |   |                |   |   |                |   |   |                |   |   |                |   |   |                |   |   |                 |   |   |  |  |

2  
3 Supplementary Figure 1. Schematic illustration of polygeninic overlap with and without genetic  
4 correlation ( $r_g$ ). Four different scenarios with and without polygeninic overlap are illustrated using  
5 synthetic data. For a pair of traits under consideration (trait 1 and trait 2), the first row illustrates  
6 the direction of effects of 10 example genetic variants (V), where + and - indicates that the variant  
7 increases or decreases the value of each trait respectively. 'NA' indicates that the variant has zero  
8 effect (not trait-associated) on the trait. The second row shows the effect of variants ( $\beta$ ) on trait 2  
9 (y-axis) plotted against their effects on trait 1 (x-axis), and each red dot represents a variant from  
10 the synthetic data.

11

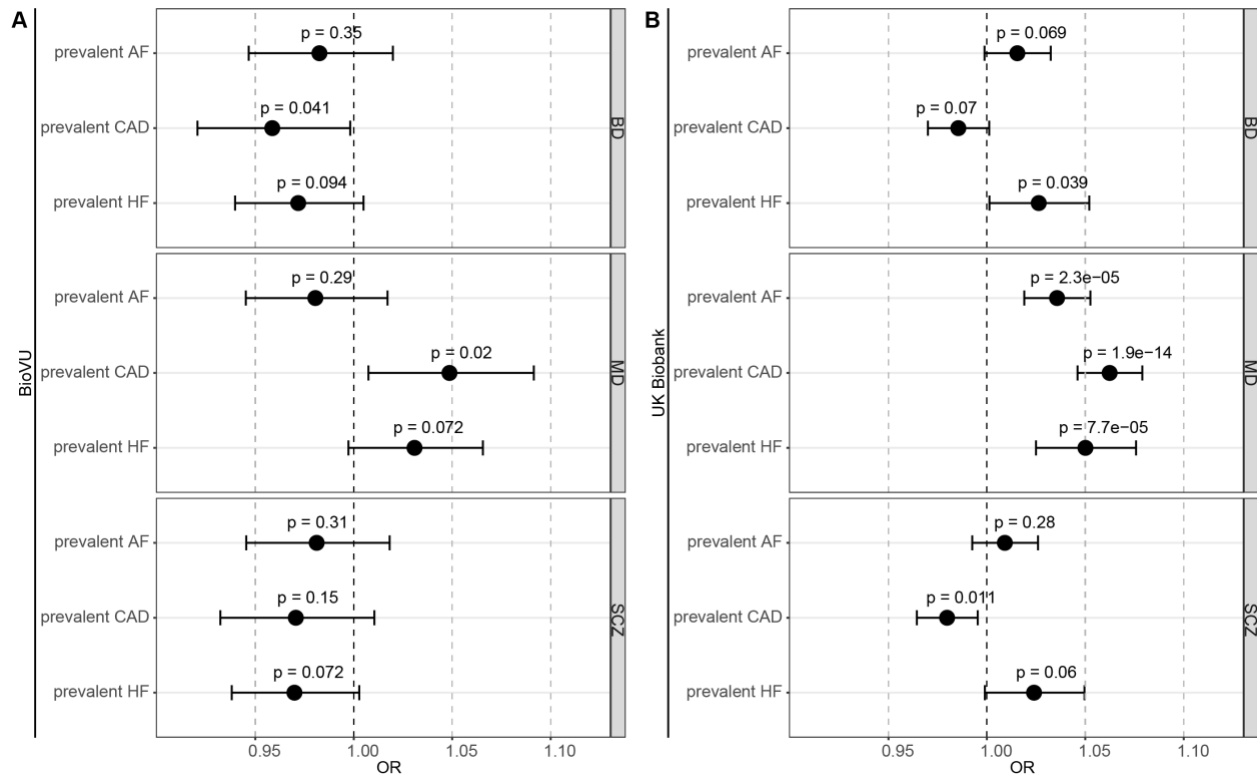

1  
2 Supplementary Figure 2. Association between psychiatric disorder PGSs and prevalent CVDs in  
3 the (A) BioVU cohort and (B) UK Biobank. Associations were estimated with logistic regressions.  
4 X-axis shows the OR per SD increase in PGS, with p-values labelled, and error bars indicate 95%  
5 confidence intervals. Dark grey line indicates OR of 1.

6



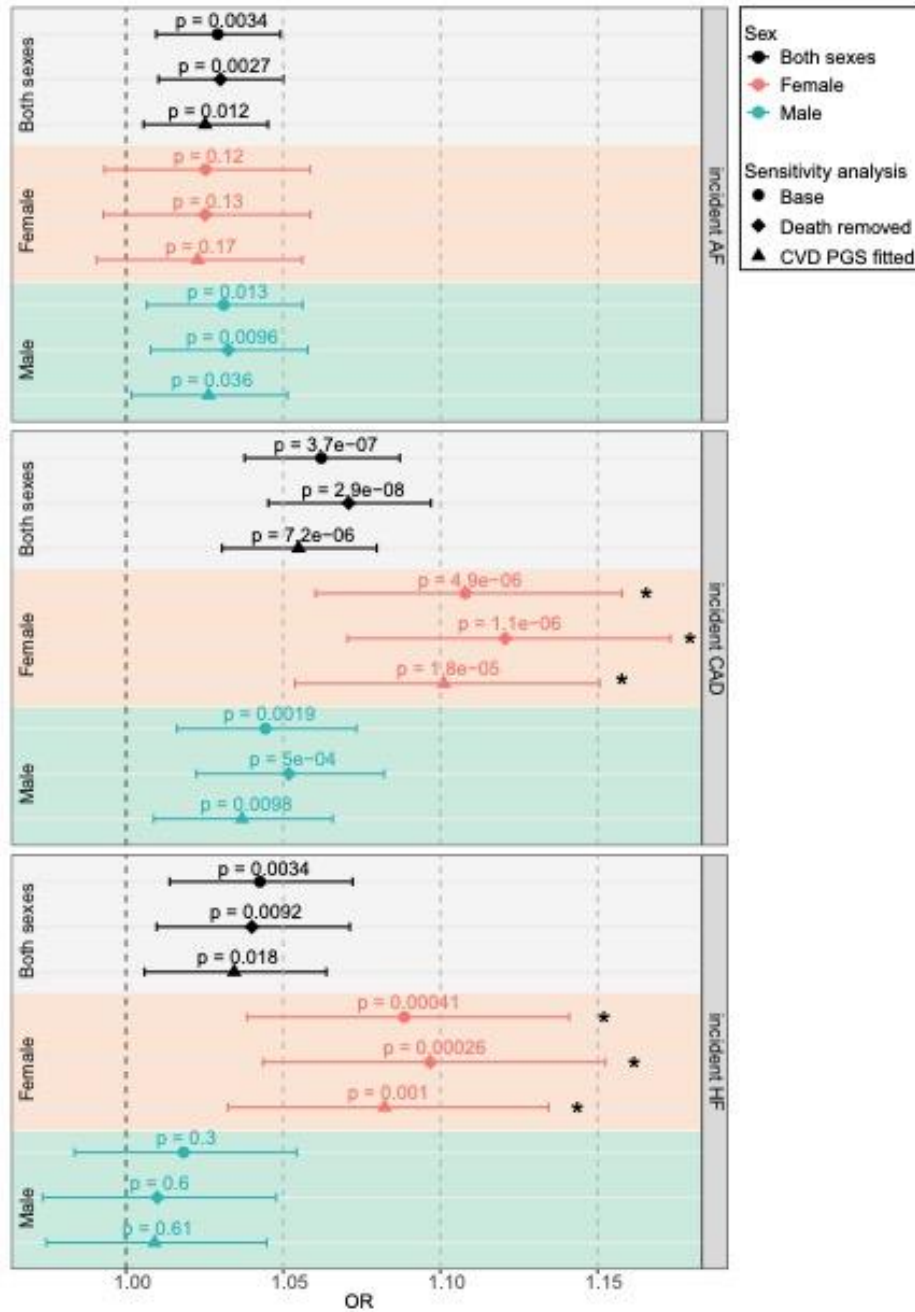

1  
2 Supplementary Figure 3. Sensitivity analyses on association between PGS<sub>MD</sub> and incident CVDs,  
3 performed on the UK Biobank cohort. The base analysis (●), with death cases included as incident  
4 cases and no CVD PGS included as covariate, is shown for the purpose of comparison. Sensitivity  
5 analyses where the death cases were removed from analysis (◆), or where the corresponding CVD  
6 PGSs were added as a covariate to the model (▲), were performed for the entire cohort (black)  
7 and for sex-stratified cohorts (red - female; blue - male). Associations were estimated with logistic  
8 regressions. X-axis shows the OR per SD increase in PGS, with p-values labelled, and error bars  
9 indicate 95% confidence intervals. Asterisk (\*) indicates a statistically significant difference in the  
10 log(OR) values between females and males (two-sided Wald test  $p < 0.05$ ). Dark grey line indicates  
11 OR of 1.

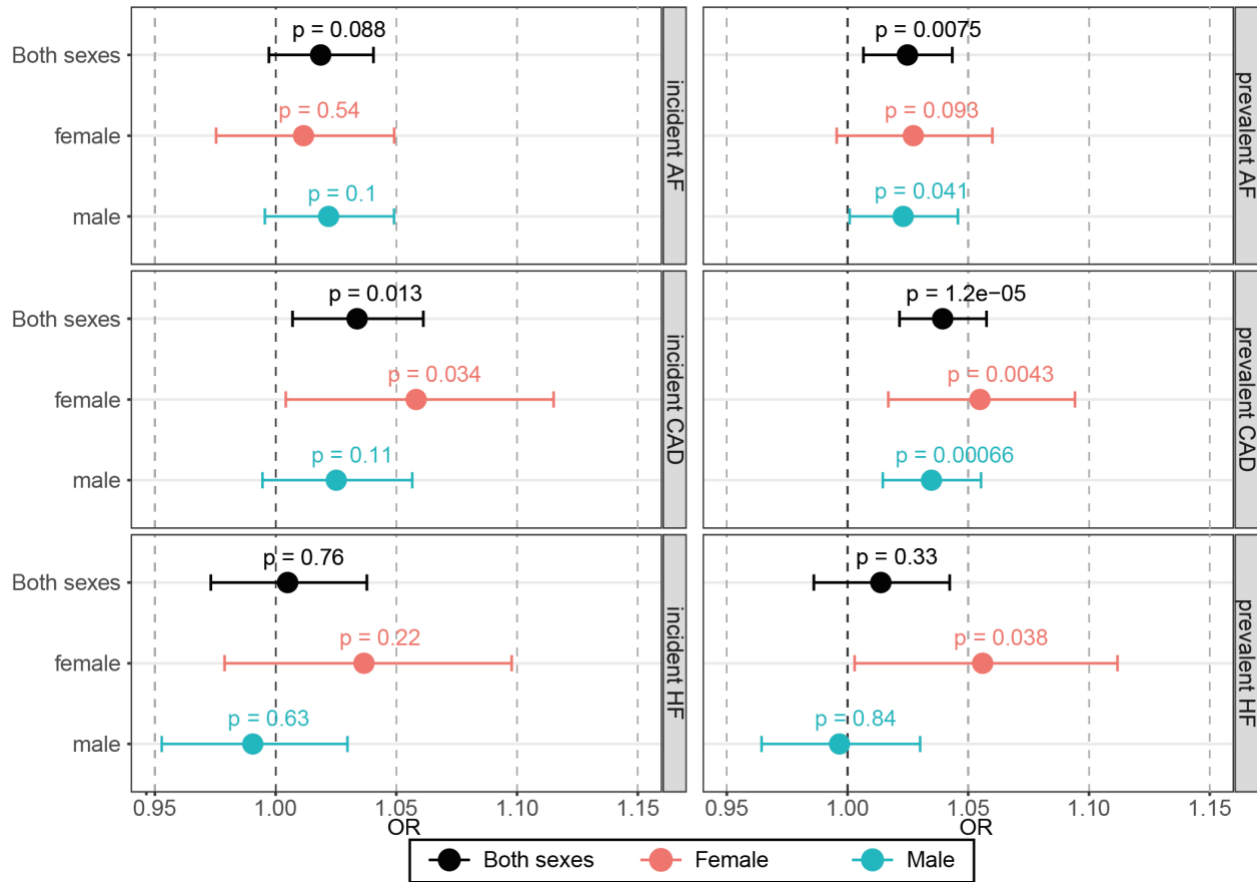

1  
2 Supplementary Figure 4. Sensitivity analyses on the association between PGS<sub>MD</sub> and CVDs  
3 amongst UK Biobank individuals with no diagnosis of psychiatric disorders and psychiatric  
4 medications. Associations were estimated with logistic regressions, where the corresponding CVD  
5 PGS was fitted as a covariate. The associations of PGS<sub>MD</sub> with incident (left) or prevalent (right)  
6 CVDs are shown for the overall (black) and sex-stratified cohorts (red - female; blue - male). X-  
7 axis shows the OR per SD increase in PGS, with p-values labelled, and error bars indicate 95%  
8 confidence intervals. Dark grey line indicates OR of 1.

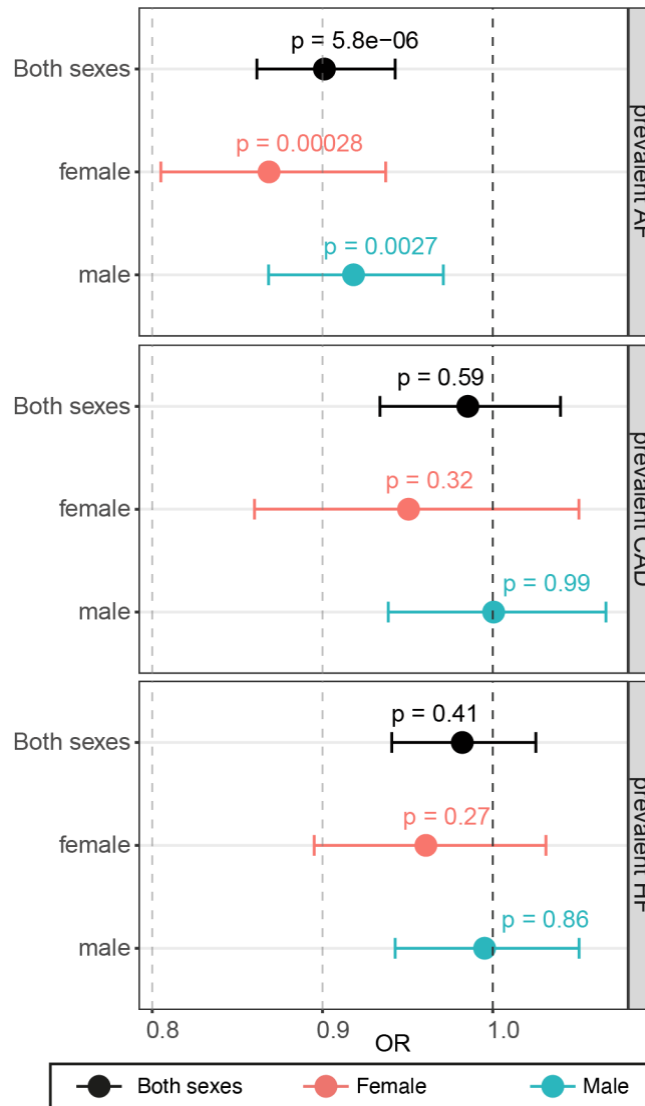

1  
 2 Supplementary Figure 5. Association between PGS<sub>MD</sub> and prevalent CVDs amongst individuals  
 3 of the BioVU cohort who had no psychiatric disorder diagnosis. The associations are shown for  
 4 the overall (black) and sex-stratified cohorts (red - female; blue - male). X-axis shows the OR per  
 5 SD increase in PGS, with p-values labelled, and error bars indicate 95% confidence intervals. Dark  
 6 grey line indicates OR of 1.

7

1 **Supplementary Tables**

2 Supplementary Table 1. Sources of GWAS summary statistics used in genetic correlation and  
 3 polygenic overlap analysis

| Trait | Sample size                                             | Ancestry | Reference                          |
|-------|---------------------------------------------------------|----------|------------------------------------|
| AF    | 60620 cases and 970216 controls                         | European | Nielsen et al. <sup>46</sup>       |
| BD    | 41917 cases and 371549 controls                         | European | Mullins et al. <sup>47</sup>       |
| CAD   | 34541 cases and 261984 controls (the UK Biobank cohort) | European | van der Harst et al. <sup>48</sup> |
| HF    | 47309 cases and 930014 controls                         | European | Shah et al. <sup>49</sup>          |
| MD    | 170756 cases and 329443 (excluding the 23andMe cohort)  | European | Howard et al. <sup>50</sup>        |
| SCZ   | 33640 cases and 43456 controls                          | European | Lam et al. <sup>51</sup>           |

4

5 Supplementary Table 2. Sources of GWAS summary statistics used in PGS SNP weight estimation  
 6 for UK Biobank

| Trait | Sample size                      | Ancestry               | Reference                                                                                                                                                                        |
|-------|----------------------------------|------------------------|----------------------------------------------------------------------------------------------------------------------------------------------------------------------------------|
| AF    | 17931 cases and 115142 controls  | Predominantly European | Christophersen et al. <sup>52</sup>                                                                                                                                              |
| BD    | 20352 cases and 31358 controls   | European               | Stahl et al. <sup>53</sup>                                                                                                                                                       |
| CAD   | 60801 cases and 123504 controls  | Predominantly European | Nikpay et al. <sup>54</sup>                                                                                                                                                      |
| HF    | 40805 cases and 542362 controls  | European               | The full dataset (including UK Biobank individuals) is available in Shah et al. <sup>49</sup> ). The dataset used in this study (with no UK Biobank individuals) is unpublished. |
| MD    | 121198 cases and 329421 controls | European               | The full dataset (including UK Biobank individuals) is available in Wray et al. <sup>55</sup> ). The dataset used in this study (with no UK Biobank individuals) is unpublished. |
| SCZ   | 40675 cases and 64643 controls   | Predominantly European | Pardiñas et al. <sup>56</sup>                                                                                                                                                    |

7

8 Supplementary Table 3. Sources of GWAS summary statistics used in PGS SNP weight estimation  
 9 for BioVU

| Trait | Sample size                                            | Ancestry | Reference                       |
|-------|--------------------------------------------------------|----------|---------------------------------|
| BD    | 41917 cases and 371549 controls                        | European | Mullins et al. <sup>47</sup>    |
| MD    | 170756 cases and 329443 (excluding the 23andMe cohort) | European | Howard et al. <sup>50</sup>     |
| SCZ   | 53386 cases and 77258 controls                         | European | Trubetskoy et al. <sup>30</sup> |

10

1 Supplementary Table 4. UK Biobank CVD phenotype ascertainment criteria

| Disease | Criteria  | Data field | Data field description                 | Codes                                                                                                                                          |
|---------|-----------|------------|----------------------------------------|------------------------------------------------------------------------------------------------------------------------------------------------|
| AF      | Inclusion | 20002      | Non-cancer illness code, self-reported | 1471, 1483                                                                                                                                     |
|         |           | 20004      | Operation code                         | 1524                                                                                                                                           |
|         |           | 41270      | Diagnoses - ICD10                      | I48, I480, I481, I482, I483, I484, I489                                                                                                        |
|         |           | 41271      | Diagnoses - ICD9                       | 4273                                                                                                                                           |
|         |           | 41272      | Operative procedures - OPCS4           | K571, K621, K622, K623, K624                                                                                                                   |
| HF      | Inclusion | 20002      | Non-cancer illness code, self-reported | 1076, 1079                                                                                                                                     |
|         |           | 41270      | Diagnoses - ICD10                      | I110, I130, I132, I255, I420, I425, I428, I429, I500, I501, I509                                                                               |
|         |           | 41271      | Diagnoses - ICD9                       | 4254, 4280, 4281, 4289                                                                                                                         |
|         | Exclusion | 20002      | Non-cancer illness code, self-reported | 1588                                                                                                                                           |
| CAD     | Inclusion | 41270      | Diagnoses - ICD10                      | I421, I422                                                                                                                                     |
|         |           | 20002      | Non-cancer illness code, self-reported | 1075                                                                                                                                           |
|         |           | 41270      | Diagnoses - ICD10                      | I210, I211, I212, I213, I214, I219, I220, I221, I228, I229, I230, I231, I232, I233, I235, I236, I238, I241, I252                               |
|         |           | 41271      | Diagnoses - ICD9                       | 4109, 4119, 4129, 4299                                                                                                                         |
|         |           | 41272      | Operative procedures - OPCS4           | K401, K402, K403, K404, K411, K412, K413, K414, K451, K452, K453, K454, K455, K491, K492, K498, K499, K502, K751, K752, K753, K754, K758, K759 |

2

1 Supplementary Table 5. UK Biobank psychiatric disorder phenotype ascertainment criteria

| Disease | Criteria                  | Data field      | Data field description                 | Codes                                                                                                                                                                                                                                                                                                                                                                                                                                                                                                                                                                                                                                                                                                                  |  |
|---------|---------------------------|-----------------|----------------------------------------|------------------------------------------------------------------------------------------------------------------------------------------------------------------------------------------------------------------------------------------------------------------------------------------------------------------------------------------------------------------------------------------------------------------------------------------------------------------------------------------------------------------------------------------------------------------------------------------------------------------------------------------------------------------------------------------------------------------------|--|
| BD      | Inclusion                 | 41270           | Diagnoses - ICD10                      | F300, F301, F302, F308, F309, F310, F311, F312, F313, F314, F315, F316, F317, F318, F319                                                                                                                                                                                                                                                                                                                                                                                                                                                                                                                                                                                                                               |  |
|         |                           | 41271           | Diagnoses - ICD9                       | 2960, 2961, 2969                                                                                                                                                                                                                                                                                                                                                                                                                                                                                                                                                                                                                                                                                                       |  |
| SCZ     | Inclusion                 | 41270           | Diagnoses - ICD10                      | F200, F201, F202, F203, F204, F205, F206, F208, F209, F21, F220, F228, F229, F230, F231, F232, F233, F238, F239, F24, F250, F251, F252, F258, F259, F28                                                                                                                                                                                                                                                                                                                                                                                                                                                                                                                                                                |  |
|         |                           | 41271           | Diagnoses - ICD9                       | 2953, 2959                                                                                                                                                                                                                                                                                                                                                                                                                                                                                                                                                                                                                                                                                                             |  |
| MD      | Inclusion                 | 41270           | Diagnoses - ICD10                      | F320, F321, F322, F323, F328, F329, F330, F331, F332, F333, F334, F338, F339, F340, F341, F348, F349, F380, F381, F388, F39                                                                                                                                                                                                                                                                                                                                                                                                                                                                                                                                                                                            |  |
|         |                           | 41271           | Diagnoses - ICD9                       | 3119, 2962                                                                                                                                                                                                                                                                                                                                                                                                                                                                                                                                                                                                                                                                                                             |  |
|         | Exclusion                 | BD cases        |                                        |                                                                                                                                                                                                                                                                                                                                                                                                                                                                                                                                                                                                                                                                                                                        |  |
|         |                           | SCZ cases       |                                        |                                                                                                                                                                                                                                                                                                                                                                                                                                                                                                                                                                                                                                                                                                                        |  |
|         |                           | 41270           | Diagnoses - ICD10                      | F448                                                                                                                                                                                                                                                                                                                                                                                                                                                                                                                                                                                                                                                                                                                   |  |
|         |                           | 20002           | Non-cancer illness code, self-reported | 1289                                                                                                                                                                                                                                                                                                                                                                                                                                                                                                                                                                                                                                                                                                                   |  |
| 20003   | Treatment/medication code | Antipsychotics: |                                        |                                                                                                                                                                                                                                                                                                                                                                                                                                                                                                                                                                                                                                                                                                                        |  |
|         |                           |                 |                                        | 1141202024, 1141153490, 1141195974, 1140867078, 1140867494, 1141171566, 2038459704, 1140872064, 1140879658, 1140867342, 1140867420, 1140882320, 1140872216, 1140910358, 1141200458, 1141172838, 1140867306, 1140867180, 1140872200, 1140867210, 1140867398, 1140882098, 1140867184, 1140867168, 1140863416, 1140909802, 1140867498, 1140867490, 1140910976, 1140867118, 1140867456, 1140928916, 1140872268, 1140867134, 1140867208, 1140867218, 1140867572, 1140879674, 1140909804, 1140867504, 1140868170, 1140879746, 1141152848, 1141177762, 1140867444, 1140867092, 1141152860, 1140872198, 1140867244, 1140868172, 1140867304, 1140872072, 1140879750, 1140868120, 1140872214, 1141201792, 1140882100, 1141167976 |  |

2

3

1 Supplementary Table 6. Exclusion criteria used to identify UK Biobank individuals with no diagnosis of psychiatric disorders and psychiatric  
 2 medications

| Criteria  | Data field       | Data field description                                     | Codes                                                                                                                                                                                                                                                                                                                                                                                                                                                                                                                                                                                                                                                                                                                                         |
|-----------|------------------|------------------------------------------------------------|-----------------------------------------------------------------------------------------------------------------------------------------------------------------------------------------------------------------------------------------------------------------------------------------------------------------------------------------------------------------------------------------------------------------------------------------------------------------------------------------------------------------------------------------------------------------------------------------------------------------------------------------------------------------------------------------------------------------------------------------------|
| Exclusion | BD cases         |                                                            |                                                                                                                                                                                                                                                                                                                                                                                                                                                                                                                                                                                                                                                                                                                                               |
|           | MD cases         |                                                            |                                                                                                                                                                                                                                                                                                                                                                                                                                                                                                                                                                                                                                                                                                                                               |
|           | SCZ cases        |                                                            |                                                                                                                                                                                                                                                                                                                                                                                                                                                                                                                                                                                                                                                                                                                                               |
|           | 20002            | Non-cancer illness code, self-reported                     | 1286, 1289, 1287, 1288, 1290, 1291, 1531                                                                                                                                                                                                                                                                                                                                                                                                                                                                                                                                                                                                                                                                                                      |
|           | 20003            | Treatment/medication code                                  | Antipsychotics: 1141202024, 1141153490, 1141195974, 1140867078, 1140867494, 1141171566, 2038459704, 1140872064, 1140879658, 1140867342, 1140867420, 1140882320, 1140872216, 1140910358, 1141200458, 1141172838, 1140867306, 1140867180, 1140872200, 1140867210, 1140867398, 1140882098, 1140867184, 1140867168, 1140863416, 1140909802, 1140867498, 1140867490, 1140910976, 1140867118, 1140867456, 1140928916, 1140872268, 1140867134, 1140867208, 1140867218, 1140867572, 1140879674, 1140909804, 1140867504, 1140868170, 1140879746, 1141152848, 1141177762, 1140867444, 1140867092, 1141152860, 1140872198, 1140867244, 1140868172, 1140867304, 1140872072, 1140879750, 1140868120, 1140872214, 1141201792, 1140882100, 1141167976        |
|           |                  |                                                            | Antidepressants: 1140867820, 1140867948, 1140879616, 1140867938, 1140867690, 1141190158, 1141151946, 1140921600, 1140879620, 1141201834, 1140867152, 1140909806, 1140879628, 1140867640, 1141200564, 1141151982, 1140916288, 1141180212, 1140867860, 1140867952, 1140879540, 1140867150, 1140909800, 1140867940, 1140879544, 1140879630, 1140867856, 1140867726, 1140867884, 1140867922, 1140910820, 1140879556, 1141152732, 1140867920, 1140882244, 1140867852, 1140867818, 1141174756, 1140867916, 1140867888, 1140867850, 1140867624, 1140867876, 1141151978, 1140882236, 1140867878, 1201, 1140882312, 1140867758, 1140867712, 1140867914, 1140867944, 1140879634, 1140867756, 1140867934, 1140867960, 1140916282, 1141200570, 1141152736 |
|           | 41270            | Diagnoses - ICD10                                          | F21, F29, F419, F410, F411, F418, F449, F444, F446, F440, F441, F448, F681, F688, F409, F400, F401, F402, F408, F341, F488, F489, F99, F601, F604, F607, F609                                                                                                                                                                                                                                                                                                                                                                                                                                                                                                                                                                                 |
| 41271     | Diagnoses - ICD9 | 3000, 3001, 3002, 3004, 3005, 3009, 3012, 3015, 3016, 3019 |                                                                                                                                                                                                                                                                                                                                                                                                                                                                                                                                                                                                                                                                                                                                               |

3

1 Supplementary Table 7. Summary of CVD phenotypes in the UK Biobank cohort

|                                           | AF                   |                     |                      |                     |                   | CAD                  |                     |                      |                     |                   | HF                   |                     |                      |                     |                   |
|-------------------------------------------|----------------------|---------------------|----------------------|---------------------|-------------------|----------------------|---------------------|----------------------|---------------------|-------------------|----------------------|---------------------|----------------------|---------------------|-------------------|
|                                           | Prevalent            |                     | Incident             |                     | Control           | Prevalent            |                     | Incident             |                     | Control           | Prevalent            |                     | Incident             |                     | Control           |
|                                           | Death cases included | Death cases removed | Death cases included | Death cases removed |                   | Death cases included | Death cases removed | Death cases included | Death cases removed |                   | Death cases included | Death cases removed | Death cases included | Death cases removed |                   |
| Total N                                   | 16224                | 16075               | 11268                | 11119               | 329116            | 18276                | 17675               | 7560                 | 6959                | 327064            | 6949                 | 6380                | 5168                 | 4599                | 338391            |
| Average recruitment age (years)           | 62.56                | 62.54               | 62.61                | 62.58               | 56.92             | 61.95                | 61.96               | 61.5                 | 61.48               | 56.92             | 62.46                | 62.45               | 62.55                | 62.54               | 57.08             |
| Average BMI                               | 28.93                | 28.93               | 28.96                | 28.96               | 27.26             | 29                   | 29                  | 28.95                | 28.95               | 27.24             | 29.8                 | 29.82               | 29.74                | 29.75               | 27.28             |
| Number of people who have ever smoked (%) | 9129<br>(56.27)      | 9032<br>(56.19)     | 6381<br>(56.63)      | 6284<br>(56.52)     | 149945<br>(45.56) | 11603<br>(63.49)     | 11226<br>(63.51)    | 4696<br>(62.12)      | 4319<br>(62.06)     | 147471<br>(45.09) | 4418<br>(63.58)      | 4030<br>(63.17)     | 3241<br>(62.71)      | 2853<br>(62.04)     | 154656<br>(45.7)  |
| Number of females (%)                     | 5482<br>(33.79)      | 5431<br>(33.79)     | 4006<br>(35.55)      | 3955<br>(35.57)     | 181287<br>(55.08) | 4206<br>(23.01)      | 4041<br>(22.86)     | 2057<br>(27.21)      | 1892<br>(27.19)     | 182563<br>(55.82) | 2225<br>(32.02)      | 2043<br>(32.02)     | 1797<br>(34.77)      | 1615<br>(35.12)     | 184544<br>(54.54) |

2



1 Supplementary Table 8. Summary of psychiatric disorder phenotypes in the UK Biobank cohort

|                                           | BD             | MD              | SCZ            | No-diagnosis/medication |
|-------------------------------------------|----------------|-----------------|----------------|-------------------------|
|                                           | Prevalent      |                 |                |                         |
| Total N                                   | 1028           | 11443           | 823            | 296929                  |
| Average recruitment age (years)           | 56.41          | 56.86           | 55.74          | 57.24                   |
| Average BMI                               | 29.13          | 28.86           | 28.75          | 27.19                   |
| Number of people who have ever smoked (%) | 577<br>(56.13) | 6461<br>(56.46) | 490<br>(59.54) | 134103<br>(45.16%)      |
| Number of females (%)                     | 607<br>(59.05) | 7236<br>(63.24) | 376<br>(45.69) | 155564<br>(52.39%)      |

2

3 Supplementary Table 9. BioVU phenotype ascertainment criteria

| Disease     | Criteria  | Codes                                                                                                                                                                            |
|-------------|-----------|----------------------------------------------------------------------------------------------------------------------------------------------------------------------------------|
| AF          | Inclusion | I48, I48.0, I48.1, I48.2, I48.3, I48.4, I48.9                                                                                                                                    |
| CAD         | Inclusion | I21.0, I21.1, I21.2, I21.3, I21.4, I21.9, I22.0, I22.1, I22.8, I22.9, I23.0, I23.1, I23.2, I23.3, I23.5, I23.6, I23.8, I24.1, I25.2                                              |
| HF          | Inclusion | I11.0, I13.0, I13.2, I25.5, I42.0, I42.5, I42.8, I42.9, I50.0, I50.1, I50.9                                                                                                      |
|             | Exclusion | I42.1, I42.2                                                                                                                                                                     |
| BD          | Inclusion | F30.0, F30.1, F30.2, F30.8, F30.9, F31.0, F31.1, F31.2, F31.3, F31.4, F31.5, F31.6, F31.7, F31.8, F31.9                                                                          |
| MD          | Inclusion | F32.0, F32.1, F32.2, F32.3, F32.4, F32.5, F32.8, F32.9, F33.0, F33.1, F33.2, F33.3, F33.4, F33.8, F33.9, F34.0, F34.1, F34.8, F34.9, F38.0, F38.1, F38.8, F39                    |
| SCZ         | Inclusion | F20.0, F20.1, F20.2, F20.3, F20.4, F20.5, F20.6, F20.8, F20.9, F21, F22.0, F22.8, F22.9, F23.0, F23.1, F23.2, F23.3, F23.8, F23.9, F24, F25.0, F25.1, F25.2, F25.8, F25.9, F28   |
| Neuroticism | Inclusion | F21, F34.1, F40.0, F40.1, F40.2, F40.8, F40.9, F41.0, F41.1, F41.8, F41.9, F44.0, F44.1, F44.4, F44.6, F44.8, F44.9, F48.8, F48.9, F60.1, F60.4, F60.7, F60.9, F68.1, F68.8, F99 |
| Psychosis   | Inclusion | F29                                                                                                                                                                              |

4

1 Supplementary Table 10. Summary of phenotypes in the BioVU cohort

|                                                 | AF              |                  | CAD             |                  | HF              |                  | BD             | MD              | SCZ            | No-diagnosis    |
|-------------------------------------------------|-----------------|------------------|-----------------|------------------|-----------------|------------------|----------------|-----------------|----------------|-----------------|
|                                                 | Case            | Control          | Case            | Control          | Case            | Control          |                |                 |                |                 |
| Total N                                         | 3372            | 59269            | 2810            | 59831            | 4131            | 58510            | 1063           | 8497            | 218            | 12917           |
| Average age (years)                             | 68.53           | 48.03            | 65.13           | 48.38            | 63.83           | 48.09            | 44.2           | 51.84           | 43.54          | 50.66           |
| Average BMI                                     | 29.91           | 27.6             | 29.67           | 27.63            | 30.17           | 27.54            | 28.98          | 29.18           | 28.6           | 28.71           |
| Number of people<br>who have ever<br>smoked (%) | 919<br>(27.25)  | 6512<br>(10.99)  | 1186<br>(42.21) | 6245<br>(10.44)  | 1347<br>(32.61) | 6084<br>(10.4)   | 414<br>(38.95) | 2298<br>(27.04) | 77<br>(35.32)  | 3195<br>(24.73) |
| Number of females<br>(%)                        | 1329<br>(39.41) | 33831<br>(57.08) | 1021<br>(36.33) | 34139<br>(57.06) | 1763<br>(42.68) | 33397<br>(57.08) | 659<br>(61.99) | 5565<br>(65.49) | 115<br>(52.75) | 8353<br>(64.67) |

2

3

1 Supplementary Table 11. Prediction accuracy of PGSs generated for the UK Biobank cohort

| PGS | Number of SNPs | N <sub>cases</sub> | N <sub>controls</sub> | OR per SD increase of PGS (95% CI) | p-value   | AUC  | Nagelkerke R <sup>2</sup> |
|-----|----------------|--------------------|-----------------------|------------------------------------|-----------|------|---------------------------|
| AF  | 1002671        | 16224              | 329116                | 1.58 (1.55 - 1.6)                  | p < 2E-16 | 0.77 | 0.030                     |
| BD  | 1008170        | 1028               | 296929                | 2.04 (1.92 - 2.18)                 | p < 2E-16 | 0.73 | 0.038                     |
| CAD | 1007431        | 18276              | 327064                | 1.63 (1.6 - 1.66)                  | p < 2E-16 | 0.80 | 0.035                     |
| HF  | 1006789        | 6949               | 338391                | 1.19 (1.16 - 1.22)                 | p < 2E-16 | 0.77 | 0.0033                    |
| MD  | 1007847        | 11443              | 296929                | 1.3 (1.27 - 1.32)                  | p < 2E-16 | 0.65 | 0.0088                    |
| SCZ | 987863         | 823                | 296929                | 2 (1.86 - 2.15)                    | p < 2E-16 | 0.72 | 0.034                     |

2

3 Supplementary Table 12. Prediction accuracy of PGSs generated for the BioVU cohort

| PGS | Number of SNPs | N <sub>cases</sub> | N <sub>controls</sub> | OR per SD increase of PGS (95% CI) | p-value   | AUC  | Nagelkerke R <sup>2</sup> |
|-----|----------------|--------------------|-----------------------|------------------------------------|-----------|------|---------------------------|
| BD  | 778307         | 1063               | 12917                 | 1.36 (1.28 - 1.45)                 | p < 2E-16 | 0.73 | 0.0098                    |
| MD  | 770389         | 8497               | 12917                 | 1.14 (1.11 - 1.16)                 | p < 2E-16 | 0.67 | 0.0033                    |
| SCZ | 779202         | 218                | 12917                 | 1.55 (1.34 - 1.79)                 | 6.5E-09   | 0.71 | 0.013                     |

4

5 Supplementary Table 13. Association with incident CVDs by psychiatric disorder PGS in the UK  
6 Biobank cohort

| PGS | CVD          | N <sub>cases</sub> | N <sub>controls</sub> | OR per SD increase of PGS (95% CI) | p-value |
|-----|--------------|--------------------|-----------------------|------------------------------------|---------|
| BD  | Incident AF  | 11268              | 329116                | 1.02 (1 - 1.04)                    | 0.022   |
|     | Incident CAD | 7560               | 327064                | 0.99 (0.97 - 1.02)                 | 0.47    |
|     | Incident HF  | 5168               | 338391                | 1.03 (1 - 1.06)                    | 0.033   |
| MD  | Incident AF  | 11268              | 329116                | 1.03 (1.01 - 1.05)                 | 0.0034  |
|     | Incident CAD | 7560               | 327064                | 1.06 (1.04 - 1.09)                 | 3.7E-07 |
|     | Incident HF  | 5168               | 338391                | 1.04 (1.01 - 1.07)                 | 0.0034  |
| SCZ | Incident AF  | 11268              | 329116                | 1.01 (0.99 - 1.03)                 | 0.28    |
|     | Incident CAD | 7560               | 327064                | 0.99 (0.97 - 1.02)                 | 0.57    |
|     | Incident HF  | 5168               | 338391                | 1.03 (1 - 1.06)                    | 0.042   |

7

8 Supplementary Table 14. Sex-stratified association with incident CVDs by PGS<sub>MD</sub> in the UK  
9 Biobank cohort

| PGS | CVD          | N <sub>cases</sub> | N <sub>controls</sub> | Sex    | OR per SD increase of PGS (95% CI) | p-value |
|-----|--------------|--------------------|-----------------------|--------|------------------------------------|---------|
|     | Incident AF  | 4006               | 181287                | Female | 1.03 (0.99 - 1.06)                 | 0.12    |
|     |              | 7262               | 147829                | Male   | 1.03 (1.01 - 1.06)                 | 0.013   |
| MD  | Incident CAD | 2057               | 182563                | Female | 1.11 (1.06 - 1.16)                 | 4.9E-06 |
|     |              | 5503               | 144501                | Male   | 1.04 (1.02 - 1.07)                 | 0.0019  |
|     | Incident HF  | 1797               | 184544                | Female | 1.09 (1.04 - 1.14)                 | 0.00041 |
|     |              | 3371               | 153847                | Male   | 1.02 (0.98 - 1.05)                 | 0.30    |

10

1 Supplementary Table 15. Association with prevalent CVDs by PGS<sub>MD</sub> in the BioVU cohort

| PGS | CVD           | N <sub>cases</sub> | N <sub>controls</sub> | Sex        | OR per SD increase of PGS (95% CI) | p-value |
|-----|---------------|--------------------|-----------------------|------------|------------------------------------|---------|
|     |               | 3372               | 59269                 | Both sexes | 0.98 (0.95 - 1.02)                 | 0.29    |
|     | Prevalent AF  | 1329               | 33831                 | Female     | 0.97 (0.92 - 1.03)                 | 0.29    |
|     |               | 2043               | 25438                 | Male       | 0.99 (0.94 - 1.04)                 | 0.6     |
|     |               | 2810               | 59831                 | Both sexes | 1.05 (1.01 - 1.09)                 | 0.02    |
| MD  | Prevalent CAD | 1021               | 34139                 | Female     | 1.09 (1.02 - 1.16)                 | 0.012   |
|     |               | 1789               | 25692                 | Male       | 1.03 (0.97 - 1.08)                 | 0.33    |
|     |               | 4131               | 58510                 | Both sexes | 1.03 (1 - 1.07)                    | 0.072   |
|     | Prevalent HF  | 1763               | 33397                 | Female     | 1.04 (0.99 - 1.09)                 | 0.13    |
|     |               | 2368               | 25113                 | Male       | 1.02 (0.98 - 1.07)                 | 0.29    |

2

3 Supplementary Table 16. Association with incident CVDs in the high-risk PGS<sub>MD</sub> group relative  
4 to the low-risk PGS<sub>MD</sub> group, estimated using the UK Biobank cohort

| PGS <sub>MD</sub> risk group | CVD          | N per risk group | Sex        | OR (95% CI)        | p-value |
|------------------------------|--------------|------------------|------------|--------------------|---------|
| 25%                          | Incident AF  | 85096            | Both sexes | 1.08 (1.02 - 1.14) | 0.0054  |
|                              |              | 46323            | Female     | 1.08 (0.99 - 1.19) | 0.076   |
|                              |              | 38773            | Male       | 1.08 (1.01 - 1.15) | 0.032   |
|                              | Incident CAD | 83656            | Both sexes | 1.17 (1.09 - 1.25) | 3.6E-06 |
|                              |              | 46155            | Female     | 1.32 (1.16 - 1.49) | 1.6E-05 |
|                              |              | 37501            | Male       | 1.12 (1.03 - 1.21) | 0.0049  |
|                              | Incident HF  | 85890            | Both sexes | 1.12 (1.03 - 1.21) | 0.0063  |
|                              |              | 46585            | Female     | 1.22 (1.07 - 1.39) | 0.0034  |
|                              |              | 39305            | Male       | 1.06 (0.96 - 1.17) | 0.24    |
| 10%                          | Incident AF  | 34039            | Both sexes | 1.08 (0.99 - 1.18) | 0.085   |
|                              |              | 18530            | Female     | 1.08 (0.93 - 1.24) | 0.31    |
|                              |              | 15509            | Male       | 1.07 (0.96 - 1.19) | 0.22    |
|                              | Incident CAD | 33463            | Both sexes | 1.24 (1.12 - 1.38) | 5.1E-05 |
|                              |              | 18462            | Female     | 1.41 (1.16 - 1.71) | 0.00057 |
|                              |              | 15001            | Male       | 1.18 (1.04 - 1.34) | 0.0093  |
|                              | Incident HF  | 34356            | Both sexes | 1.11 (0.97 - 1.26) | 0.12    |
|                              |              | 18634            | Female     | 1.25 (1 - 1.55)    | 0.046   |
|                              |              | 15722            | Male       | 1.03 (0.88 - 1.21) | 0.69    |

5

6

1 Supplementary Table 17. Overall and sex-stratified associations with incident and prevalent CVDs  
 2 by PGS<sub>MD</sub> amongst UK Biobank individuals with no diagnosis of psychiatric disorders and  
 3 psychiatric medications

| PGS | CVD           | N <sub>cases</sub> | N <sub>controls</sub> | Sex        | OR per SD increase of PGS (95% CI) | p-value |
|-----|---------------|--------------------|-----------------------|------------|------------------------------------|---------|
| MD  | Incident AF   | 9322               | 283434                | Both sexes | 1.02 (1 - 1.04)                    | 0.035   |
|     |               | 3096               | 151321                | Female     | 1.01 (0.98 - 1.05)                 | 0.45    |
|     |               | 6226               | 132113                | Male       | 1.03 (1 - 1.05)                    | 0.045   |
|     | Prevalent AF  | 13495              | 283434                | Both sexes | 1.03 (1.01 - 1.05)                 | 0.0015  |
|     |               | 4243               | 151321                | Female     | 1.03 (1 - 1.06)                    | 0.065   |
|     |               | 9252               | 132113                | Male       | 1.03 (1.01 - 1.05)                 | 0.011   |
|     | Incident CAD  | 6013               | 281953                | Both sexes | 1.04 (1.01 - 1.07)                 | 0.0025  |
|     |               | 1461               | 152500                | Female     | 1.07 (1.01 - 1.12)                 | 0.018   |
|     |               | 4552               | 129453                | Male       | 1.03 (1 - 1.06)                    | 0.037   |
|     | Prevalent CAD | 14976              | 281953                | Both sexes | 1.05 (1.03 - 1.07)                 | 8.2E-08 |
|     |               | 3064               | 152500                | Female     | 1.06 (1.03 - 1.1)                  | 0.00099 |
|     |               | 11912              | 129453                | Male       | 1.04 (1.02 - 1.06)                 | 1.8E-05 |
|     | Incident HF   | 3920               | 291612                | Both sexes | 1.01 (0.98 - 1.05)                 | 0.41    |
|     |               | 1219               | 154051                | Female     | 1.04 (0.99 - 1.11)                 | 0.14    |
|     |               | 2701               | 137561                | Male       | 1 (0.96 - 1.04)                    | 0.99    |
|     | Prevalent HF  | 5317               | 291612                | Both sexes | 1.02 (0.99 - 1.05)                 | 0.12    |
|     |               | 1513               | 154051                | Female     | 1.06 (1.01 - 1.12)                 | 0.021   |
|     |               | 3804               | 137561                | Male       | 1.01 (0.97 - 1.04)                 | 0.74    |

4
